# Supplementary material for: Common schizophrenia alleles are enriched in mutation-intolerant genes and in regions under strong background selection
Source: Springer Nature journal article supplement (doi:10.1038/s41588-018-0059-2), 2018-02-25
Supplement: MOESM3 [file 41588_2018_59_MOESM3_ESM.xlsx]

## Sheet: Index
Supplementary Table	Description
Table 1	Sign tests for concordance of datasets used in the present study with the previous PGC SZ GWAS.
Table 2	Polygenic risk score profile of datasets used in the present study.
Table 3	Independent genome-wide significant association signals from the CLOZUK + PGC meta-analysis, clumped.
Table 4	Independent genome-wide significant association signals from the CLOZUK + PGC meta-analysis, clumped and amalgamated into loci.
Table 5	Independent genome-wide significant association signals from the PGC study, and their corresponding statistics in the CLOZUK + PGC meta-analysis.
Table 6	Replication of 50 newly discovered loci in a combined independent sample (5,662 cases and 154,224 controls)
Table 7	Partitioned heritability analysis of broad genomic categories.
Table 8	Partitioned heritability analysis of background selection in schizophrenia and other phenotypes.
Table 9	MAGMA analysis results of the CNS-related gene set collection.
Table 10	MAGMA analysis results of the data-driven gene set collection.
Table 11	List of annotated FINEMAP SNPs with cumulative probability 95%.
Table 12	Hi-C and Functional Characterisation of FINEMAPPED SNPs with Posterior Probability >50%.
Table 13	SMR of CLOZUK+PGC2 data in the CommonMind Consortium DLPFC Brain eQTL data.
Table 14	Independent genome-wide significant association signals from the main CLOZUK GWAS, clumped and amalgamated into loci (see Methods).
Table 15	Liability-scale SNP-based h2 of schizophrenia in the datasets used in the present study, for a range of population prevalences of the disorder.

## Sheet: Supp Table 1
Supplementary Data Table 1: Sign tests for concordance of datasets used in the present study with the previous PGC SZ GWAS.
Independent PGC refers to the PGC samples excluding CLOZUK samples.
Dataset 1 - training set	Dataset 2-testing set	P-value threshold	Associated SNPs total (clumped)	Associated SNPs with same direction of effect	%SNPs in same direction	P-value
Independent PGC	CLOZUK	GWS (5.00E-8)	76	75	0.986842	2.04e-21
Independent PGC	CLOZUK	1e-06	153	145	0.947712	1.14e-33
Independent PGC	CLOZUK	1e-05	401	353	0.880299	1.71e-58
Independent PGC	CLOZUK	0.0001	1160	950	0.818966	9.23e-113
PGC	CLOZUK2 (new samples)	GWS (5.00E-8)	110	103	0.9364	5.25e-23
PGC	CLOZUK2 (new samples)	1e-06	260	229	0.8808	1.72e-38
PGC	CLOZUK2 (new samples)	1e-05	616	507	0.8231	2.87e-62
PGC	CLOZUK2 (new samples)	0.0001	1613	1232	0.7638	1.65e-104

## Sheet: Supp Table 2
Supplementary Data Table 2: Polygenic risk score profile of datasets used in the present study.
Independent PGC refers to the PGC samples excluding CLOZUK samples.
Training set	Testing set	Score P-value threshold	P-value (Cases vs. Controls)	Nagelkerke pseudo-R2	AUROC	Liability-scale R2	Liability-scale R2 s.e.
Independent PGC	CLOZUK	5e-08	1.1e-133	0.024	0.578906	0.0108809	0.00087303
Independent PGC	CLOZUK	1e-05	2.75e-217	0.039	0.600735	0.0178241	0.00111014
Independent PGC	CLOZUK	0.001	< 1E-300	0.0804	0.645388	0.0376735	0.00158452
Independent PGC	CLOZUK	0.05	< 1E-300	0.1186	0.677236	0.0567852	0.00191158
Independent PGC	CLOZUK	0.5	< 1E-300	0.1168	0.675942	0.0559236	0.00189851
PGC	CLOZUK2 (new samples)	5e-08	1.56e-69	0.0207	0.577727	0.0105559	0.00118458
PGC	CLOZUK2 (new samples)	1e-05	5.92e-108	0.0324	0.596767	0.0164309	0.00147156
PGC	CLOZUK2 (new samples)	0.001	1.08e-223	0.0671	0.639936	0.0348278	0.00211394
PGC	CLOZUK2 (new samples)	0.05	< 1E-300	0.0973	0.669172	0.0515342	0.00254065
PGC	CLOZUK2 (new samples)	0.5	< 1E-300	0.0973	0.669169	0.051532	0.0025406

## Sheet: Supp Table 3
Supplementary Data Table 3: Independent genome-wide significant association signals from the CLOZUK + PGC meta-analysis, clumped.
Chromosome	Start (BP)	End (BP)	Index SNP (dbSNP b141)	A1	A2	OR	SE	P-value	CLOZUK MAF	CLOZUK INFO	CLOZUK OR	CLOZUK SE	CLOZUK P-value	INDEPENDENT PGC MAF	INDEPENDENT PGC INFO	INDEPENDENT PGC OR	INDEPENDENT PGC SE	INDEPENDENT PGC P-value	Heterogeneity Q	Heterogeneity P-value	Number of SNPs	Length (KB)	Gene(s) tagged
6	24988105	33842877	rs3130820	T	A	1.2806	0.017695	2.12e-44	0.11116	0.9864	1.3338	0.0277	2.597e-25	0.0882031	0.787	1.24521	0.023	1.335e-21	3.644	0.05626	12997	8854.77	xMHC
12	2285731	2440464	rs2007044	A	G	0.91513	0.0096913	5.63e-20	0.400614	1	0.9044	0.0167	1.807e-09	0.382463	0.989	0.92063	0.0119	3.932e-12	0.752	0.3857	143	154.734	CACNA1C, CACNA1C-AS4, CACNA1C-IT3
7	1851205	2343621	rs10650434	A	ACT	0.918145	0.0097	1.098e-18	0.435764	0.9804	1.10619	0.0169	2.191e-09	0.41296	1	1.08091	0.0118	4.15e-11	0	1	594	492.417	FTSJ2, MAD1L1, MIR4655, MIR6836, NUDT1, SNX8
1	98036832	98651527	rs2660304	G	T	0.89739	0.012376	2.18e-18	0.18484	0.9878	0.9106	0.0216	1.522e-05	0.185653	0.994	0.891011	0.0151	1.963e-14	0.681	0.4093	395	614.696	DPYD, DPYD-AS2, MIR137, MIR137HG, MIR2682
10	104229588	105274900	rs12416331	T	A	1.1566	0.016888	7.09e-18	0.0741581	0.9601	1.1491	0.0328	2.304e-05	0.100976	0.999	1.15929	0.0197	5.772e-14	0.053	0.8176	459	1045.31	ACTR1A, ARL3, AS3MT, C10orf32, C10orf32-ASMT, CALHM1, CALHM2, CALHM3, CNNM2, CYP17A1, INA, MIR1307, NEURL1, NT5C2, PCGF6, PDCD11, RPEL1, SFXN2, SUFU, TAF5, TMEM180, TRIM8, USMG5, WBP1L
8	143267749	143410423	rs58033671	A	ACCCCTGCACGCCCG	1.0873	0.0097	8.649e-18	0.465471	0.9779	0.906043	0.0167	3.616e-09	0.456309	0.934	0.92682	0.012	2.611e-10	0	1	167	142.675	LINC00051, TSNARE1
2	200536068	201309547	rs2949006	T	G	1.1053	0.011892	3.69e-17	0.203896	0.976	1.107	0.0205	7.1e-07	0.196078	0.987	1.10451	0.0146	1.133e-11	0.008	0.9287	359	773.48	C2orf47, C2orf69, FTCDNL1, SPATS2L, TYW5
20	37277618	37512698	rs6065094	A	G	0.91843	0.010211	7.91e-17	0.320245	0.979	0.9144	0.018	6.384e-07	0.315807	1	0.92035	0.0124	2.33e-11	0.088	0.7667	249	235.081	ACTR5, ARHGAP40, PPP1R16B, SLC32A1
4	102547366	103388441	rs13107325	C	T	0.85248	0.019267	1.19e-16	0.0805426	0.891	0.8498	0.0314	2.232e-07	0.0696739	0.934	0.85411	0.0244	9.495e-11	0.016	0.8988	87	841.076	BANK1, SLC39A8
2	233550961	233814878	rs4144797	T	C	1.0852	0.010059	4.33e-16	0.361453	0.9827	1.0931	0.0172	2.437e-07	0.34504	0.962	1.08112	0.0124	2.95e-10	0.27	0.6033	301	263.918	C2orf82, GIGYF2, KCNJ13, NGEF
12	123310521	123927262	rs2851447	G	C	1.0911	0.010765	5.55e-16	0.245935	0.9848	1.0844	0.0192	2.371e-05	0.26804	0.995	1.09418	0.013	5.241e-12	0.15	0.6987	619	616.742	ABCB9, ARL6IP4, C12orf65, CCDC62, CDK2AP1, HIP1R, LOC100507091, MIR4304, MIR8072, MPHOSPH9, OGFOD2, PITPNM2, RILPL2, SBNO1, SETD8, VPS37B
11	124583878	124653926	rs12293670	A	G	1.0841	0.010137	1.7e-15	0.33291	1	1.0924	0.0176	4.979e-07	0.328653	0.986	1.07993	0.0124	5.314e-10	0.284	0.5939	60	70.049	ESAM, MSANTD2, NRGN, VSIG2
1	73264393	74115945	rs12129573	C	A	0.9264	0.0098601	8.94e-15	0.347825	0.9915	0.9065	0.0173	1.475e-08	0.366617	0.996	0.936128	0.012	4.025e-08	2.333	0.1266	1168	851.553	LOC101927295
22	42225018	42689370	rs6002655	C	T	0.92769	0.0098227	2.15e-14	0.42069	0.9541	0.9104	0.0171	3.883e-08	0.450501	0.95	0.936321	0.012	3.866e-08	1.806	0.179	344	464.353	CENPM, CYP2D6, CYP2D7P, FAM109B, LINC00634, LOC388906, LOC101929829, MIR33A, NAGA, NDUFA6, NDUFA6-AS1, SEPT3, SHISA8, SMDT1, SREBF2, TCF20, TNFRSF13C, WBP2NL
12	110265586	111275317	rs4766428	C	T	0.92666	0.010005	2.68e-14	0.436185	0.9338	0.9195	0.0172	1.032e-06	0.483962	0.94	0.930345	0.0123	3.834e-09	0.307	0.5792	310	1009.73	ANAPC7, ANKRD13A, ARPC3, ATP2A2, C12orf76, FAM216A, GIT2, GLTP, GPN3, HVCN1, IFT81, MIR4497, PPP1CC, PPTC7, RAD9B, TCHP, TCTN1, TRPV4, VPS29
14	103849715	104537680	rs10083370	G	A	1.078	0.0099099	3.44e-14	0.414084	0.874	1.0864	0.0179	3.446e-06	0.40877	0.973	1.07433	0.0119	1.657e-09	0.27	0.6033	492	687.966	APOPT1, BAG5, C14orf2, CKB, KLC1, LINC00637, MARK3, PPP1R13B, RD3L, TDRD9, TRMT61A, XRCC3, ZFYVE21
7	85924492	86580674	rs12704290	G	A	1.1207	0.015044	3.57e-14	0.111771	0.9556	1.1549	0.0274	1.453e-07	0.119345	0.991	1.10628	0.018	2.019e-08	1.721	0.1895	82	656.183	GRM3, KIAA1324L
5	59911693	60847272	rs7701440	T	C	0.93016	0.0095633	3.72e-14	0.497449	0.9886	0.9296	0.0166	1.106e-05	0.468578	0.999	0.93044	0.0117	6.74e-10	0.002	0.9645	387	935.58	CTC-436P18.1, DEPDC1B, ELOVL7, ERCC8, NDUFAF2, SMIM15, ZSWIM6
18	52716306	52827668	rs5825114	G	GA	0.929694	0.0097	5.027e-14	0.405965	0.9983	0.92885	0.0169	1.188e-05	0.427268	0.99	0.930155	0.0118	8.647e-10	0	1	89	111.363	LOC101927229
11	133792743	133853694	rs4936215	A	G	1.0956	0.012135	5.32e-14	0.212288	0.927	1.0927	0.0212	2.842e-05	0.209076	0.942	1.09702	0.0148	3.758e-10	0.023	0.8787	69	60.952	IGSF9B
11	46227161	47371598	rs7951870	T	C	0.9109	0.012793	2.99e-13	0.17224	0.9799	0.9024	0.0218	2.563e-06	0.16077	0.993	0.91539	0.0158	2.088e-08	0.282	0.5955	346	1144.44	ACP2, AMBRA1, ARFGAP2, ARHGAP1, ATG13, C11orf49, CHRM4, CKAP5, CREB3L1, DDB2, DGKZ, F2, HARBI1, LRP4, LRP4-AS1, MADD, MDK, MIR3160-1, MIR3160-2, MIR4688, MIR5582, MIR6745, MYBPC3, NR1H3, PACSIN3, SNORD67, ZNF408
2	198144002	198954774	rs6434928	G	A	1.0757	0.010044	3.62e-13	0.336193	0.9962	1.0721	0.0174	6.462e-05	0.362539	0.956	1.07756	0.0123	1.441e-09	0.057	0.8115	668	810.773	ANKRD44, ANKRD44-IT1, BOLL, COQ10B, HSPD1, HSPE1, HSPE1-MOB4, MARS2, MOB4, PLCL1, RFTN2, SF3B1
18	53183396	53477819	rs28758902	C	T	0.93354	0.0095085	4.75e-13	0.435755	0.9978	0.9409	0.0166	0.0002481	0.448193	0.998	0.929973	0.0116	4.309e-10	0.333	0.5641	147	294.424	TCF4
10	18601928	18968668	rs7893279	T	G	1.1177	0.015387	4.8e-13	0.114412	0.9847	1.0922	0.0265	0.0008511	0.106345	1	1.13088	0.0189	6.897e-11	1.143	0.285	150	366.741	ARL5B, CACNB2, NSUN6
18	53022896	53630222	rs144158419	C	T	1.1421	0.018388	5.03e-13	0.08258	0.9201	1.1835	0.0322	1.686e-07	0.0753111	0.955	1.12255	0.0224	2.348e-07	1.817	0.1777	93	607.327	LOC101927273, MIR4529, TCF4
16	29923510	30177807	rs11646127	G	C	1.0733	0.0098036	5.52e-13	0.45865	0.9517	1.0937	0.017	1.397e-07	0.438076	0.945	1.06322	0.012	2.984e-07	1.845	0.1744	174	254.298	ALDOA, C16orf92, DOC2A, FAM57B, GDPD3, HIRIP3, INO80E, KCTD13, MAPK3, PPP4C, TAOK2, TBX6, TMEM219, YPEL3
22	41027819	42386534	rs9607782	T	A	0.92208	0.01125	5.54e-13	0.261916	0.9728	0.916	0.0189	3.476e-06	0.235193	0.943	0.925429	0.014	3.203e-08	0.19	0.6633	218	1358.72	ACO2, C22orf46, CCDC134, CENPM, CHADL, CSDC2, DESI1, DNAJB7, EP300, EP300-AS1, L3MBTL2, LINC00634, MCHR1, MEI1, MIR33A, MIR1281, MIR4766, MIR6889, MKL1, NHP2L1, PHF5A, PMM1, POLR3H, RANGAP1, RBX1, SEPT3, SHISA8, SLC25A17, SREBF2, ST13, TEF, TNFRSF13C, TOB2, XPNPEP3, XRCC6, ZC3H7B
6	83967454	84414411	rs217287	C	T	1.0715	0.009675	9.53e-13	0.436356	0.9796	1.0889	0.0169	4.374e-07	0.435807	0.972	1.06311	0.0118	2.358e-07	1.353	0.2448	427	446.958	ME1, PRSS35, SNAP91
X	68377126	68377205	rs62606711	A	G	1.07476	0.0101978	1.264e-12	0.272153	1.5092	1.09975	0.0177	8.26e-08	0.219193	1.28	1.06269	0.0124	9.818e-07	2.5156	0.1127	4	0.079	PJA1
22	39866938	40058186	rs5757730	A	G	0.93125	0.010101	1.76e-12	0.498185	0.8696	0.9235	0.0177	6.833e-06	0.432731	0.94	0.93501	0.0123	4.899e-08	0.33	0.5655	132	191.249	ATF4, CACNA1I, MGAT3, MIEF1, RPS19BP1
2	57941185	58500141	rs7596038	C	T	1.0695	0.0095823	2.37e-12	0.427663	1	1.0496	0.0167	0.003694	0.429383	0.994	1.07939	0.0117	6.817e-11	1.884	0.1699	383	558.957	FANCL, VRK2
3	2428745	2582549	rs35346733	C	T	1.0752	0.010352	2.42e-12	0.343978	0.9845	1.0996	0.0176	6.965e-08	0.306577	0.991	1.06258	0.0128	2.045e-06	0.028	0.8677	200	153.805	CNTN4
11	113299829	113448762	rs2514218	G	A	0.91673	0.012407	2.42e-12	0.198457	0.9811	0.9142	0.0207	1.485e-05	0.17777	0.939	0.918147	0.0155	3.715e-08	2.477	0.1155	68	148.934	DRD2, MIR4301
15	91402803	91437388	rs17514846	A	C	0.9335	0.0098306	2.55e-12	0.46451	0.9976	0.9314	0.0166	1.818e-05	0.432038	0.946	0.93463	0.0122	3.024e-08	0.028	0.8665	38	34.586	FES, FURIN
3	52217088	53281183	rs1080500	G	A	1.075	0.01034	2.71e-12	0.334276	0.9123	1.0933	0.0184	1.262e-06	0.346499	0.944	1.06662	0.0125	2.577e-07	1.233	0.2667	776	1064.1	ALAS1, BAP1, DNAH1, GLT8D1, GLYCTK, GNL3, ITIH1, ITIH3, ITIH4, MIR135A1, MIR8064, MIRLET7G, MUSTN1, NEK4, NISCH, NT5DC2, PBRM1, PHF7, PPM1M, PRKCD, RFT1, SEMA3G, SFMBT1, SMIM4, SNORD19, SNORD19B, SNORD69, SPCS1, STAB1, TKT, TLR9, TMEM110, TMEM110-MUSTN1, TNNC1, TWF2, WDR82
15	78711803	79021464	rs3743078	C	G	0.92481	0.01121	3.11e-12	0.227384	0.9966	0.9483	0.0198	0.00737	0.280152	1	0.91393	0.0136	4.322e-11	2.362	0.1243	235	309.662	CHRNA3, CHRNA5, CHRNB4, HYKK, IREB2, PSMA4
3	180524764	181245320	rs34796896	G	A	1.0868	0.01195	3.19e-12	0.199343	0.9751	1.0806	0.0211	0.0002412	0.202499	0.987	1.08981	0.0145	3.221e-09	0.11	0.7402	321	720.557	DNAJC19, FXR1, LOC101928882, SOX2-OT
10	104613089	105218254	rs7476192	T	G	1.0753	0.010452	3.77e-12	0.329613	0.9165	1.047	0.0184	0.01243	0.357383	0.912	1.08904	0.0127	1.613e-11	3.101	0.07827	31	605.166	AS3MT, C10orf32, C10orf32-ASMT, CALHM1, CALHM2, CNNM2, INA, MIR1307, NT5C2, PCGF6, PDCD11, RPEL1, TAF5, USMG5
3	135669219	136752653	rs7432375	G	A	0.92281	0.011584	4.07e-12	0.392094	1	1.0466	0.0169	0.007132	0.445883	0.988	1.08231	0.012	3.607e-11	2.62	0.1055	564	1083.44	IL20RB, MSL2, NCK1, NCK1-AS1, PCCB, PPP2R3A, SLC35G2, STAG1
8	111460027	112015011	rs36043959	G	A	1.0702	0.0097843	4.07e-12	0.225801	1	0.9236	0.0195	4.6e-05	0.200347	0.988	0.922382	0.0144	2.274e-08	0.003	0.9566	193	554.985	none
2	199776050	200305460	rs1451488	A	G	0.93506	0.0097121	4.75e-12	0.436215	0.9568	0.9196	0.0171	8.932e-07	0.451076	0.981	0.94252	0.0118	5.335e-07	1.404	0.236	235	529.411	SATB2
1	30411185	30516776	rs6694545	A	G	1.0798	0.011172	6.2e-12	0.244482	0.9784	1.0792	0.0193	8.046e-05	0.238924	0.975	1.08015	0.0137	1.757e-08	0.001	0.9703	95	105.592	LOC101929406
19	19331847	19800987	rs2905432	G	A	1.071	0.0099892	6.62e-12	0.357768	0.9668	1.0841	0.0174	3.587e-06	0.368193	0.958	1.0646	0.0122	2.922e-07	0.73	0.393	414	469.141	ATP13A1, CILP2, GATAD2A, GMIP, HAPLN4, LPAR2, MAU2, NCAN, NDUFA13, PBX4, SUGP1, TM6SF2, TSSK6, YJEFN3, ZNF101
1	2368232	2402499	rs4648845	C	T	0.92646	0.01113	6.74e-12	0.498374	0.6349	0.9336	0.0207	0.0008938	0.463615	0.796	0.923574	0.0132	1.897e-09	0.193	0.6601	47	34.268	none
8	27319905	27470778	rs11783093	C	T	1.0976	0.013607	7.64e-12	0.15517	1	1.138	0.0232	2.484e-08	0.150615	0.99	1.07702	0.0168	1.047e-05	3.697	0.05451	77	150.874	CHRNA2, CLU, EPHX2, MIR6843
5	151887779	152360494	rs111294930	A	G	1.0858	0.012069	9.04e-12	0.290928	0.9577	1.076	0.0187	8.993e-05	0.213884	0.823	1.09286	0.0158	1.99e-08	0.403	0.5254	438	472.716	LOC101927134
4	176795426	176973267	rs62334820	C	T	0.92209	0.011906	9.6e-12	0.210346	0.9826	0.9163	0.0203	1.597e-05	0.193924	0.977	0.925146	0.0147	1.32e-07	0.147	0.7015	90	177.842	GPM6A
2	146363633	146441828	rs56807175	T	TC	0.916127	0.0129	1.363e-11	0.188894	0.8322	1.09769	0.0229	4.576e-05	0.164924	0.977	1.08861	0.0157	5.859e-08	0	1	34	78.196	none
1	43793214	44480093	rs2970610	T	C	1.0702	0.010045	1.39e-11	0.329166	0.9715	1.0588	0.0177	0.001268	0.329886	1	1.07573	0.0122	2.584e-09	0.545	0.4606	367	686.88	ARTN, ATP6V0B, B4GALT2, CCDC24, CDC20, DPH2, ELOVL1, HYI, IPO13, KDM4A, KDM4A-AS1, MED8, MIR6079, MIR6734, MIR6735, MPL, PTPRF, SLC6A9, ST3GAL3, SZT2
18	52704850	53601811	rs79926379	A	G	0.84474	0.025044	1.61e-11	0.0366588	0.9647	0.8174	0.0433	3.279e-06	0.0401157	0.984	0.85882	0.0307	7.337e-07	0.867	0.3517	115	896.962	LOC101927229, LOC101927273, MIR4529, TCF4
5	87407727	88871993	rs16867576	A	G	1.1063	0.014996	1.65e-11	0.133986	0.9602	1.1104	0.0251	3.028e-05	0.112461	0.942	1.10396	0.0187	1.291e-07	0.035	0.8526	61	1464.27	LINC00461, LOC102546226, MEF2C, MEF2C-AS1, MIR9-2, TMEM161B, TMEM161B-AS1
11	130706918	130894699	rs35774874	T	C	1.0714	0.010276	1.97e-11	0.486478	0.7782	1.0849	0.0187	1.325e-05	0.446653	0.885	1.06556	0.0123	2.643e-07	0.646	0.4216	288	187.782	SNX19
22	41733262	42690311	rs1023497	C	G	1.0846	0.012117	2.04e-11	0.198045	0.9844	1.1308	0.0211	6.036e-09	0.185884	1	1.06258	0.0148	4.326e-05	5.829	0.01576	157	957.05	ACO2, C22orf46, CCDC134, CENPM, CSDC2, CYP2D6, CYP2D7P, DESI1, FAM109B, LINC00634, LOC388906, LOC101929829, MEI1, MIR33A, NAGA, NDUFA6, NDUFA6-AS1, NHP2L1, PHF5A, PMM1, POLR3H, SEPT3, SHISA8, SMDT1, SREBF2, TCF20, TEF, TNFRSF13C, TOB2, WBP2NL, XRCC6, ZC3H7B
12	57569478	57836098	rs61937595	C	T	1.1331	0.018836	3.28e-11	0.0928606	0.8274	1.1841	0.032	1.258e-07	0.0859727	0.773	1.10694	0.0233	1.327e-05	2.898	0.08871	25	266.621	INHBC, LRP1, MIR1228, NDUFA4L2, NXPH4, R3HDM2, SHMT2, STAC3
8	60475926	61117903	rs1473594	T	C	1.0661	0.0096561	3.33e-11	0.40436	1	1.0621	0.0168	0.0003255	0.405501	1	1.06812	0.0118	2.089e-08	0.076	0.7831	453	641.978	CA8
5	152505453	152785000	rs2910032	C	T	1.0653	0.0095633	3.72e-11	0.492878	0.9864	1.062	0.0166	0.0002946	0.452155	1	1.06695	0.0117	3.027e-08	0.052	0.8188	198	279.548	none
19	50067508	50182697	rs7508148	T	C	1.0802	0.011683	4.06e-11	0.237653	0.8551	1.1058	0.0212	2.007e-06	0.251461	0.92	1.06919	0.014	1.655e-06	1.756	0.1851	104	115.19	BCL2L12, IRF3, NOSIP, PRMT1, PRR12, PRRG2, RRAS, SCAF1
7	110737149	111236477	rs12705761	G	C	1.0677	0.0099709	5.11e-11	0.357282	0.9681	1.0749	0.0176	3.906e-05	0.39396	0.98	1.06428	0.0121	2.514e-07	0.216	0.6421	141	499.329	IMMP2L, LRRN3
5	44642670	46405055	rs16902086	A	G	0.93616	0.010063	5.55e-11	0.337723	0.9861	0.9494	0.0175	0.003004	0.35777	0.962	0.92969	0.0123	3.356e-09	0.962	0.3267	1338	1762.39	HCN1, LOC100506674, MRPS30
7	104471787	105064593	rs7789569	T	C	1.0674	0.010005	7e-11	0.359095	0.9977	1.0763	0.0172	1.8e-05	0.34877	0.971	1.0629	0.0123	6.481e-07	0.351	0.5535	360	592.807	KMT2E, KMT2E-AS1, LHFPL3, LHFPL3-AS2, LINC01004, SRPK2
7	137010589	137093743	rs3735025	T	C	1.0667	0.0098965	7.02e-11	0.368118	0.99	1.0547	0.0172	0.001986	0.349807	0.999	1.07262	0.0121	7.273e-09	0.642	0.423	97	83.155	DGKI, PTN
9	84498152	85129970	rs1319017	G	A	0.93575	0.01021	7.82e-11	0.340361	0.9557	0.9214	0.0177	3.975e-06	0.348962	0.976	0.942987	0.0125	2.85e-06	1.142	0.2852	252	631.819	SPATA31D1, SPATA31D3, SPATA31D4, SPATA31D5P
3	36834099	36964583	rs75968099	C	T	0.93637	0.010152	9.41e-11	0.345295	0.9882	0.9611	0.0174	0.0229	0.330732	0.981	0.923856	0.0125	2.342e-10	3.403	0.06508	74	130.485	TRANK1
4	176717618	176756594	rs12498839	G	A	0.87979	0.019789	9.67e-11	0.0611306	0.9739	0.8222	0.0341	9.45e-09	0.0618233	0.964	0.910556	0.0243	0.000116	5.942	0.01478	35	38.977	GPM6A
3	63715318	64005452	rs704373	A	G	1.0667	0.010063	1.39e-10	0.315655	0.9906	1.0866	0.0178	2.873e-06	0.346116	0.992	1.05749	0.0122	5.082e-06	1.584	0.2083	112	290.135	ATXN7, C3orf49, PSMD6, PSMD6-AS2, THOC7, THOC7-AS1
12	57331741	57519694	rs324015	T	C	0.93063	0.01121	1.42e-10	0.228922	1	0.9144	0.0198	6.359e-06	0.25923	0.962	0.93838	0.0136	3.027e-06	1.161	0.2812	20	187.954	GPR182, MYO1A, NAB2, RDH16, STAT6, TAC3, TMEM194A, ZBTB39
14	72382471	72467631	rs2332700	C	G	1.0725	0.010931	1.52e-10	0.250955	1	1.0804	0.0189	4.208e-05	0.254078	0.978	1.06855	0.0134	7.563e-07	0.227	0.6341	98	85.161	RGS6
1	243614180	244025999	rs14403	C	T	1.077	0.011617	1.71e-10	0.217211	0.9709	1.0663	0.0205	0.001709	0.215807	1	1.0821	0.0141	2.173e-08	0.349	0.5544	258	411.82	AKT3, SDCCAG8
X	5859733	6029533	rs12009217	A	G	0.936974	0.0101978	1.781e-10	0.199879	1.5829	0.9239	0.0194	4.645e-05	0.193655	1.49	0.94214	0.012	6.5e-07	0.7345	0.3914	51	169.801	NLGN4X
19	30981639	31052274	rs2053079	A	G	0.93172	0.011092	1.82e-10	0.254717	0.9935	0.9404	0.0189	0.001156	0.233501	0.987	0.92719	0.0137	3.529e-08	0.367	0.5445	115	70.636	ZNF536
16	58538662	58734713	rs42945	A	G	0.93882	0.0099526	2.25e-10	0.481232	0.8929	0.9069	0.0175	2.338e-08	0.411307	0.975	0.95447	0.0121	0.0001207	5.774	0.01626	210	196.052	CNOT1, NDRG4, SETD6, SLC38A7, SNORA46, SNORA76A
11	132506523	132581442	rs2917569	T	C	1.0629	0.0096913	3.11e-10	0.497212	0.977	1.087	0.0167	5.986e-07	0.459345	0.955	1.05085	0.0119	2.946e-05	2.72	0.09907	76	74.92	OPCML
6	73058954	73172294	rs1339227	C	T	1.0647	0.010008	3.76e-10	0.343648	0.9987	1.0748	0.0175	3.588e-05	0.363114	0.98	1.05982	0.0122	1.83e-06	0.433	0.5105	56	113.341	RIMS1
22	40043812	40091818	rs4820386	C	T	0.9407	0.0097781	4.07e-10	0.457774	0.9904	0.9451	0.0166	0.0006799	0.499577	0.974	0.938377	0.0121	1.456e-07	0.121	0.7282	30	48.007	CACNA1I
2	201113452	201333001	rs1347692	C	T	1.0623	0.009675	4.11e-10	0.464779	0.9565	1.0845	0.0169	1.596e-06	0.487385	0.986	1.05169	0.0118	1.853e-05	2.221	0.1361	75	219.55	SPATS2L
14	29999987	30300361	rs1191551	T	G	1.0756	0.011657	4.12e-10	0.227184	0.995	1.0995	0.0196	1.245e-06	0.213655	0.953	1.06269	0.0145	2.62e-05	1.951	0.1625	201	300.375	MIR548AI, PRKD1
16	13673040	13763411	rs7499750	A	C	1.0731	0.011303	4.24e-10	0.229425	0.9805	1.0592	0.0197	0.003493	0.229347	0.996	1.08004	0.0138	2.179e-08	0.656	0.4179	95	90.372	none
17	2017029	2220814	rs7216638	T	A	1.0667	0.010358	4.59e-10	0.3484	0.9461	1.0504	0.0179	0.00597	0.314922	0.96	1.07498	0.0127	1.287e-08	1.111	0.2919	300	203.786	LOC101927839, SMG6, SRR
1	239166610	239298749	rs72769124	C	A	0.89692	0.017468	4.73e-10	0.101631	0.9092	0.8645	0.0281	2.213e-07	0.0811506	0.854	0.917962	0.0223	0.0001224	2.798	0.09439	40	132.14	none
14	29275791	29594625	rs10148671	T	C	0.93862	0.010208	5.46e-10	0.33883	0.9214	0.9107	0.0183	2.945e-07	0.372268	0.999	0.95151	0.0123	5.168e-05	3.953	0.0468	30	318.835	none
5	151437972	152654479	rs79212538	G	T	0.86845	0.02274	5.55e-10	0.0482274	0.9763	0.8776	0.0382	0.0006335	0.0484003	0.965	0.863468	0.0283	2.217e-07	0.117	0.7328	107	1216.51	CTB-12O2.1, LOC101927134, NMUR2
8	38014429	38316849	rs10156310	A	T	1.0755	0.01173	5.56e-10	0.230249	1	1.0856	0.0197	3.126e-05	0.225922	0.905	1.06994	0.0146	3.499e-06	0.351	0.5535	210	302.421	BAG4, DDHD2, FGFR1, LETM2, LSM1, PPAPDC1B, WHSC1L1
1	190757036	191408693	rs28374258	T	A	0.92924	0.011873	6.35e-10	0.185835	0.9689	0.919	0.0213	7.479e-05	0.205385	0.998	0.93389	0.0143	1.77e-06	0.392	0.531	143	651.658	LOC440704
2	145120947	145214607	rs12991836	A	C	0.94079	0.0098773	6.46e-10	0.357198	1	0.9286	0.0171	1.575e-05	0.378116	0.981	0.94696	0.0121	6.848e-06	0.874	0.35	21	93.661	ZEB2
1	149998923	151115887	rs140505938	C	T	1.0873	0.013541	6.5e-10	0.167684	0.8625	1.0689	0.024	0.005469	0.157499	0.992	1.09593	0.0164	2.345e-08	0.738	0.3903	564	1116.96	ADAMTSL4, ADAMTSL4-AS1, ANP32E, ANXA9, APH1A, ARNT, BNIPL, C1orf54, C1orf56, CA14, CDC42SE1, CERS2, CIART, CTSK, CTSS, ECM1, ENSA, FAM63A, GABPB2, GOLPH3L, HORMAD1, LINC00568, MCL1, MIR4257, MIR6878, MLLT11, MRPS21, PLEKHO1, PRPF3, PRUNE, RPRD2, SEMA6C, SETDB1, TARS2, VPS45
5	137450345	137948140	rs13169274	T	C	0.9421	0.009675	7.06e-10	0.467083	0.9629	0.9582	0.0169	0.01142	0.475537	0.986	0.93435	0.0118	9.167e-09	1.495	0.2214	141	497.796	BRD8, CDC23, CDC25C, EGR1, ETF1, FAM53C, GFRA3, HSPA9, KDM3B, KIF20A, NME5, REEP2, SNORD63
7	85575489	87275389	rs147922658	T	TAAG	0.849846	0.0265	7.713e-10	0.0373726	0.9761	0.806517	0.0458	2.718e-06	0.0333344	1	0.87241	0.0324	2.487e-05	0	1	213	1699.9	ABCB1, ABCB4, CROT, DMTF1, GRM3, KIAA1324L, RUNDC3B, TMEM243, TP53TG1
19	11849736	11943697	rs72986630	C	T	0.8693	0.0228	8.09e-10	0.0664298	0.8072	0.9106	0.0363	0.009969	0.0587735	0.692	0.843412	0.0293	6.063e-09	2.7	0.1004	5	93.962	ZNF440, ZNF441, ZNF491, ZNF823
15	82426170	83575025	rs783540	A	G	0.94268	0.0096196	8.45e-10	0.392068	1	0.9597	0.0169	0.01465	0.394347	1	0.93463	0.0117	6.72e-09	1.658	0.1978	268	1148.86	ADAMTS7P1, AP3B2, CPEB1, EFTUD1, FAM154B, FSD2, GOLGA6L9, GOLGA6L10, GOLGA6L17P, HOMER2, LOC80154, LOC283692, LOC283693, LOC338963, LOC727751, LOC102724034, RPS17, SCARNA15, SNHG21, UBE2Q2P2, WHAMM
15	84608488	85392298	rs12908161	A	G	1.0689	0.010896	9.41e-10	0.259756	0.9987	1.0726	0.019	0.0002356	0.256769	0.995	1.06716	0.0133	1.024e-06	0.048	0.8265	323	783.811	ADAMTSL3, ALPK3, DNM1P41, EFTUD1P1, GOLGA2P7, GOLGA6L4, GOLGA6L5P, LINC00933, LOC440300, LOC642423, LOC102724034, LOC103171574, NMB, SCAND2P, SEC11A, UBE2Q2L, UBE2Q2P1, WDR73, ZNF592, ZSCAN2
2	73511262	74101954	rs56145559	C	T	0.93086	0.01173	1.01e-09	0.224565	0.99	0.9446	0.0197	0.003929	0.201193	0.96	0.923395	0.0146	5.126e-08	0.857	0.3545	345	590.693	ALMS1, ALMS1-IT1, ALMS1P, C2orf78, DUSP11, EGR4, NAT8, NAT8B, STAMBP, TPRKB
9	100991430	101079033	rs10985817	T	C	0.92304	0.013116	1.02e-09	0.161412	0.9309	0.8882	0.0229	2.352e-07	0.153385	0.995	0.94054	0.016	0.0001307	4.201	0.0404	118	87.604	GABBR2, MIR6854, TBC1D2
8	143267760	143413334	rs67439964	T	C	1.0752	0.011912	1.16e-09	0.234416	0.9094	1.0842	0.0206	8.828e-05	0.219192	0.913	1.07069	0.0146	3.026e-06	0.247	0.6195	60	145.575	LINC00051, TSNARE1
11	24264778	24533962	rs1899543	A	T	0.94397	0.0094896	1.23e-09	0.482708	1	0.9571	0.0165	0.007924	0.49477	0.995	0.93754	0.0116	2.961e-08	1.048	0.306	139	269.185	LUZP2
5	152744817	152899532	rs12522290	C	G	1.0826	0.013097	1.34e-09	0.176023	0.991	1.0785	0.022	0.0005774	0.164769	0.983	1.08491	0.0163	5.483e-07	0.047	0.8287	52	154.716	GRIA1
11	57369008	57735431	rs7129727	G	A	0.93938	0.010341	1.47e-09	0.342314	1	0.9284	0.0173	1.709e-05	0.295347	0.963	0.945537	0.0129	1.46e-05	0.718	0.3967	263	366.424	BTBD18, C11orf31, CLP1, CTNND1, MED19, MIR130A, SERPING1, TMX2, TMX2-CTNND1, YPEL4, ZDHHC5
3	180860434	181256285	rs55672338	T	A	0.9427	0.0097648	1.52e-09	0.487199	0.9705	0.9295	0.0168	1.262e-05	0.484345	0.942	0.949514	0.012	1.502e-05	1.065	0.3021	109	395.852	SOX2-OT
8	27186652	27330813	rs2565065	A	G	1.0658	0.010581	1.74e-09	0.307781	1	1.0702	0.0177	0.0001311	0.27077	0.96	1.06332	0.0132	3.518e-06	0.085	0.7702	94	144.162	CHRNA2, MIR6842, PTK2B
1	243203672	243627135	rs10803138	A	G	0.9345	0.011299	2.03e-09	0.249486	0.9789	0.9317	0.0194	0.0002639	0.232307	0.986	0.93594	0.0139	1.858e-06	0.036	0.8491	185	423.464	CEP170, LOC731275, MIR4677, SDCCAG8
18	77563334	77580712	rs56775891	C	T	0.93556	0.011111	2.03e-09	0.282789	0.7234	0.9088	0.0214	7.759e-06	0.285655	0.971	0.945635	0.013	1.775e-05	2.518	0.1126	17	17.379	none
3	17219137	17888256	rs11409090	A	AT	0.941859	0.01	2.112e-09	0.493656	0.9588	1.07654	0.0169	1.233e-05	0.464846	0.924	1.0538	0.0124	2.276e-05	0	1	592	669.12	TBC1D5
18	53768975	53804156	rs1789595	A	T	1.068	0.011007	2.23e-09	0.277701	0.8313	1.064	0.0203	0.002232	0.272076	0.987	1.06972	0.0131	2.686e-07	0.049	0.8244	11	35.182	LOC100505474
12	2456062	2523772	rs12823424	A	G	1.0656	0.010636	2.28e-09	0.279886	0.9924	1.0406	0.0185	0.03141	0.27823	0.983	1.07821	0.013	7.038e-09	2.466	0.1164	49	67.711	CACNA1C
7	109946567	110245369	rs211829	T	C	1.0608	0.0098773	2.29e-09	0.377474	0.9934	1.0651	0.0171	0.0002315	0.365076	0.996	1.05866	0.0121	2.527e-06	0.084	0.7722	218	298.803	none
15	61813790	61909712	rs12898315	G	A	0.94469	0.0095456	2.51e-09	0.445982	0.9824	0.9439	0.0168	0.0005794	0.474845	1	0.945063	0.0116	1.234e-06	0.004	0.9519	68	95.923	none
2	200768453	200768453	rs200626410	T	TTC	0.928765	0.0125	2.947e-09	0.223865	0.6656	0.974469	0.0243	0.2887	0.198655	0.988	0.91302	0.0145	3.9e-10	0	1	1	0.001	none
1	8352642	8838528	rs34269918	G	GA	0.941294	0.0102	3.268e-09	0.370497	0.9822	0.93985	0.0172	0.0003085	0.30277	0.989	0.942143	0.0127	2.843e-06	0	1	141	485.887	RERE, SLC45A1
8	26119170	26279173	rs1042992	C	T	0.9293	0.012431	3.67e-09	0.16794	0.9943	0.9124	0.0219	2.791e-05	0.181962	1	0.937444	0.0151	1.937e-05	1.036	0.3087	29	160.004	BNIP3L, PPP2R2A
2	225308978	225469611	rs11685299	C	A	1.0622	0.010248	3.86e-09	0.312406	1	1.0552	0.0179	0.002628	0.321922	0.986	1.06567	0.0125	3.269e-07	0.204	0.6512	74	160.634	CUL3
16	63547390	63776400	rs17465671	C	A	1.0592	0.0097843	4.14e-09	0.491334	0.9565	1.0515	0.0169	0.002894	0.483884	0.942	1.06311	0.012	3.228e-07	0.28	0.5964	127	229.011	none
2	185405580	186057716	rs10196799	A	T	1.0577	0.0095633	4.51e-09	0.454601	0.9938	1.0264	0.0166	0.1166	0.454383	0.977	1.07358	0.0117	1.447e-09	4.897	0.02691	135	652.137	ZNF804A
2	57895438	58502679	rs75575209	A	T	0.90534	0.016967	4.6e-09	0.0952765	0.9587	0.9137	0.0283	0.001426	0.0893851	0.908	0.90068	0.0212	8.072e-07	0.165	0.6848	89	607.242	FANCL, VRK2
12	39414371	39964006	rs10783624	C	A	1.0615	0.01023	5.44e-09	0.313086	0.9909	1.0666	0.0178	0.0002847	0.350116	0.986	1.05897	0.0125	4.901e-06	0.109	0.7415	178	549.636	ABCD2, KIF21A
3	60277174	60303504	rs1353545	G	C	0.94265	0.010137	5.67e-09	0.334745	0.9761	0.9435	0.0176	0.0009769	0.386	0.982	0.942232	0.0124	1.627e-06	0.004	0.9502	49	26.331	FHIT
7	131533769	131619847	rs7801375	A	G	0.92557	0.013314	6.27e-09	0.15885	0.9923	0.941	0.0228	0.007617	0.147461	0.992	0.91769	0.0164	1.575e-07	0.798	0.3718	68	86.079	LOC101928782
16	9875513	9970227	rs7191183	T	C	0.94221	0.010248	6.31e-09	0.311231	0.9812	0.9503	0.0179	0.004412	0.307924	0.994	0.93829	0.0125	3.674e-07	0.339	0.5602	158	94.715	GRIN2A
18	53230650	53230650	rs66791238	T	C	1.0719	0.011966	6.41e-09	0.212063	0.9746	1.0681	0.0206	0.001399	0.200615	0.956	1.0739	0.0147	1.266e-06	0.046	0.8306	1	0.001	TCF4
8	89188046	89761163	rs7010876	T	A	1.0641	0.01071	6.51e-09	0.260011	1	1.0574	0.0186	0.002703	0.269193	0.996	1.06748	0.0131	6.272e-07	0.174	0.6768	586	573.118	MMP16
20	20814132	20843441	rs6035706	A	G	0.94205	0.010319	7.24e-09	0.312988	1	0.9557	0.0177	0.01069	0.305231	0.982	0.9351	0.0127	1.19e-07	1.001	0.3172	32	29.31	none
12	103347511	103390444	rs36104021	CA	C	1.07229	0.0121	7.31e-09	0.120597	0.9661	1.1642	0.0263	7.625e-09	0.106154	0.937	1.05834	0.0194	0.003466	8.509	0.003533	32	42.934	ASCL1
14	30105291	30190833	rs199687649	C	G	1.0945	0.015612	7.313e-09	0.203219	0.9344	1.07481	0.0211	0.0006221	0.212808	0.921	1.07101	0.0147	2.902e-06	0	1	6	85.543	MIR548AI, PRKD1
2	199921578	200332499	rs34719143	T	TC	1.09308	0.0154	7.708e-09	0.0665613	0.7613	0.876885	0.0387	0.0006811	0.152076	0.974	0.92219	0.0168	1.376e-06	0	1	9	410.922	SATB2
6	143629340	143714330	rs72342102	T	TTTTG	1.06673	0.0112	7.93e-09	0.235772	0.9918	1.07308	0.0194	0.0002757	0.230078	0.992	1.06354	0.0137	7.197e-06	0	1	23	84.991	AIG1
2	22499207	22822159	rs12712510	T	C	1.0593	0.010002	8.18e-09	0.470103	0.8368	1.0738	0.0181	8.159e-05	0.497154	0.974	1.05306	0.012	1.585e-05	0.807	0.3691	238	322.953	LOC102723362
8	4177231	4210746	rs139425113	G	GA	0.935569	0.0116	8.476e-09	0.195353	0.9881	1.04504	0.0208	0.03466	0.226116	0.999	1.07961	0.0139	3.634e-08	0	1	82	33.516	CSMD1
14	33257891	33309495	rs34179565	CA	C	0.945728	0.0097	8.879e-09	0.461397	0.9715	1.05186	0.0168	0.002598	0.449347	0.958	1.06024	0.0119	9.459e-07	0	1	51	51.605	AKAP6
6	83789798	84092546	rs4470825	G	A	1.0572	0.009675	8.94e-09	0.433619	0.9719	1.0564	0.0169	0.001187	0.470537	0.975	1.0576	0.0118	1.941e-06	0.003	0.9562	35	302.749	DOPEY1, ME1, PGM3, RWDD2A
8	143293307	143404118	rs4976967	G	A	1.0668	0.01125	9.07e-09	0.305914	0.9123	1.0806	0.0189	3.907e-05	0.293307	0.844	1.05929	0.014	3.67e-05	0.717	0.3971	5	110.812	TSNARE1
3	71481192	71679664	rs7632921	G	T	1.0582	0.0098513	9.52e-09	0.434705	0.9934	1.0652	0.0167	0.0001579	0.410345	0.997	1.05443	0.0122	1.364e-05	0.241	0.6232	114	198.473	FOXP1, MIR1284
8	18388177	18458140	rs2410572	G	A	1.0561	0.0095456	1.07e-08	0.436261	0.9791	1.0643	0.0168	0.0002058	0.458808	0.994	1.05222	0.0116	1.241e-05	0.313	0.5761	53	69.964	PSD3
11	30183742	30437981	rs1765142	C	A	0.94407	0.010078	1.13e-08	0.352541	1	0.9247	0.0173	6.369e-06	0.325884	1	0.95418	0.0124	0.000158	2.174	0.1404	191	254.24	ARL14EP, FSHB, MPPED2
13	79855297	80192906	rs9545047	A	C	1.0576	0.0098044	1.15e-08	0.394147	0.9576	1.0805	0.0173	7.853e-06	0.383615	0.996	1.04687	0.0119	0.0001184	2.268	0.1321	385	337.61	NDFIP2, NDFIP2-AS1, RBM26, RBM26-AS1
1	177170720	177428790	rs4650963	T	C	1.0557	0.0095085	1.16e-08	0.12718	0.9422	0.8982	0.0252	1.996e-05	0.122808	0.992	0.932297	0.0176	7.082e-05	1.469	0.2255	175	258.071	BRINP2
15	70573650	70603159	rs12148337	G	T	0.92098	0.014429	1.16e-08	0.46713	0.9901	1.0839	0.0166	1.211e-06	0.470808	1	1.04227	0.0116	0.0003454	3.74	0.05312	32	29.51	none
3	161146130	161520740	rs489939	G	A	1.0587	0.010025	1.24e-08	0.363405	0.9892	1.0583	0.0173	0.001062	0.337461	0.994	1.05897	0.0123	3.413e-06	0.001	0.9761	229	374.611	LOC101243545, OTOL1
6	93044855	93177270	rs634940	G	T	0.93865	0.011134	1.3e-08	0.269941	0.9823	0.9276	0.0186	5.457e-05	0.232347	0.973	0.944876	0.0139	4.269e-05	0.632	0.4268	85	132.416	none
8	33604120	34674539	rs55669358	T	C	0.90946	0.016715	1.37e-08	0.0934104	0.9551	0.9197	0.0286	0.003445	0.085962	0.994	0.9042	0.0206	9.986e-07	0.233	0.6296	168	1070.42	none
3	53273192	53539241	rs312477	G	A	1.0674	0.011499	1.38e-08	0.229034	0.9078	1.083	0.0208	0.0001235	0.248922	0.957	1.06067	0.0138	1.861e-05	0.697	0.4039	72	266.05	CACNA1D, DCP1A, TKT
4	23334811	23443552	rs215411	T	A	0.94382	0.010191	1.4e-08	0.327848	0.9882	0.9767	0.0176	0.1823	0.31904	0.993	0.927652	0.0125	2.102e-09	5.696	0.017	74	108.742	MIR548AJ2
12	23214508	23642695	rs1120004	T	G	1.0636	0.010877	1.42e-08	0.263094	0.9709	1.077	0.0189	8.817e-05	0.251924	0.99	1.05707	0.0133	3.074e-05	0.653	0.419	234	428.188	LOC101928441
16	7744180	7761736	rs12447542	G	A	0.91818	0.015058	1.44e-08	0.121159	0.8913	0.9175	0.0265	0.001164	0.124924	0.933	0.91851	0.0183	3.491e-06	0.001	0.9728	14	17.557	RBFOX1
10	18538669	18574980	rs7099380	G	C	1.0913	0.015428	1.47e-08	0.472012	0.9839	0.9466	0.0167	0.001006	0.425884	0.995	0.947436	0.0117	4.248e-06	0.002	0.9655	40	36.312	CACNB2
17	18917237	19322062	rs66885728	G	A	0.94716	0.0095823	1.47e-08	0.148927	0.7364	1.0932	0.0273	0.001084	0.16623	0.752	1.09046	0.0187	3.705e-06	0.006	0.9397	74	404.826	B9D1, EPN2, EPN2-AS1, EPN2-IT1, GRAP, GRAPL, LOC79999, LOC388436, MAPK7, MFAP4, MIR1180, RNF112, SLC5A10
11	113431960	113451229	rs4936277	A	G	1.058	0.0099674	1.52e-08	0.445636	0.8594	1.0742	0.0179	6.645e-05	0.408731	0.957	1.05085	0.012	3.856e-05	1.04	0.3078	4	19.27	none
7	24557497	24844736	rs146678232	CA	C	0.931555	0.0126	1.631e-08	0.18013	0.9843	1.09661	0.0214	1.635e-05	0.167231	0.99	1.06151	0.0155	0.0001143	0	1	188	287.24	DFNA5, MPP6, OSBPL3
14	99657227	99735480	rs35604463	G	A	1.0577	0.0099449	1.66e-08	0.436411	0.9684	1.0652	0.0169	0.0001901	0.398884	0.957	1.0538	0.0123	1.926e-05	0.265	0.6066	71	78.254	BCL11B
5	49441779	49884022	rs77853293	C	T	1.0561	0.0096913	1.77e-08	0.467775	0.9839	1.0449	0.0167	0.00839	0.452924	0.954	1.06184	0.0119	4.717e-07	0.615	0.4328	295	442.244	EMB
14	103793539	104511206	rs80020004	C	T	0.91817	0.015176	1.85e-08	0.144673	0.9527	0.9358	0.0238	0.005309	0.113655	0.852	0.90629	0.0197	6.123e-07	1.076	0.2997	4	717.668	APOPT1, BAG5, C14orf2, CKB, EIF5, KLC1, LINC00637, MARK3, PPP1R13B, RD3L, SNORA28, TDRD9, TRMT61A, XRCC3, ZFYVE21
6	114612973	114775668	rs760608	G	A	1.0626	0.010803	1.9e-08	0.266006	0.9733	1.0763	0.0188	9.423e-05	0.263808	0.98	1.05591	0.0132	3.715e-05	0.693	0.4051	41	162.696	none
3	10793110	10872262	rs6800435	C	A	0.92097	0.014669	2e-08	0.103193	0.9914	0.8992	0.0269	7.759e-05	0.129116	0.99	0.930345	0.0175	3.83e-05	1.126	0.2887	40	79.153	LINC00606, SLC6A11
11	65378028	65577846	rs58950470	G	T	0.94418	0.010245	2.07e-08	0.349366	0.9572	0.9344	0.0176	0.0001168	0.32477	0.971	0.949235	0.0126	3.455e-05	0.53	0.4668	68	199.819	AP5B1, KAT5, MAP3K11, MIR4489, MIR4690, OVOL1, OVOL1-AS1, PCNXL3, RELA, RNASEH2C, SIPA1
12	92243186	92395053	rs4240748	C	G	0.9458	0.0099509	2.15e-08	0.370197	0.9956	0.9554	0.0172	0.007825	0.362038	0.979	0.94101	0.0122	6.289e-07	0.518	0.4717	22	151.868	C12orf79
15	47524423	47751837	rs281299	C	T	0.94633	0.0098579	2.19e-08	0.377077	1	0.9334	0.017	4.991e-05	0.374192	0.981	0.952944	0.0121	7.002e-05	0.986	0.3207	77	227.415	SEMA6D
15	40550149	40599296	rs56282503	T	C	0.93958	0.011152	2.3e-08	0.304008	0.8633	0.9401	0.0192	0.001329	0.28577	0.873	0.93932	0.0137	4.699e-06	0.001	0.9719	20	49.148	ANKRD63, PAK6, PLCB2
1	173479023	175000887	rs6701877	G	T	1.076	0.013116	2.37e-08	0.16784	0.9556	1.1178	0.0229	1.15e-06	0.183076	0.924	1.05612	0.016	0.0006408	4.128	0.04218	554	1521.86	ANKRD45, CACYBP, CENPL, DARS2, GAS5, GAS5-AS1, GPR52, KLHL20, LOC730159, MRPS14, RABGAP1L, RC3H1, SERPINC1, SLC9C2, SNORD44, SNORD47, SNORD74, SNORD75, SNORD76, SNORD77, SNORD78, SNORD79, SNORD80, SNORD81, ZBTB37
17	17649172	18035019	rs4925114	A	G	1.0582	0.010172	2.64e-08	0.357862	0.9582	1.0547	0.0175	0.002387	0.408269	0.971	1.06003	0.0125	2.886e-06	0.055	0.8147	346	385.848	ATPAF2, DRG2, GID4, LRRC48, MIR33B, MIR6777, MYO15A, RAI1, SMCR5, SREBF1, TOM1L2
11	132387460	132417766	rs5795787	G	GTAA	1.05601	0.0098	2.689e-08	0.461804	0.9988	0.932053	0.0165	2.111e-05	0.472307	0.936	0.955137	0.0122	0.0001584	0	1	51	30.307	OPCML
2	200387210	200632032	rs76432012	T	C	1.1502	0.025182	2.75e-08	0.064921	0.787	1.1737	0.0388	3.637e-05	0.0453074	0.751	1.13338	0.0331	0.0001538	0.47	0.4931	5	244.823	FTCDNL1, LOC101927641
3	16747942	17119238	rs9881798	T	C	1.0544	0.0095441	2.81e-08	0.413197	0.9872	0.9467	0.0168	0.001127	0.40377	0.973	0.94791	0.0119	7.336e-06	0.004	0.9505	81	371.297	MIR3714, PLCL2
4	170198392	170647421	rs10520163	A	C	0.94751	0.0097107	2.81e-08	0.498632	0.998	1.0271	0.0165	0.1051	0.474155	0.994	1.06844	0.0117	1.581e-08	3.806	0.05107	262	449.03	CLCN3, NEK1
1	95746349	95944432	rs6680011	A	C	0.92911	0.013245	2.83e-08	0.146418	0.99	0.9406	0.0233	0.008446	0.150962	0.991	0.92367	0.0161	8.795e-07	0.411	0.5213	145	198.084	FLJ31662
6	128301981	128334236	rs35736453	T	TC	0.9412	0.0109	2.951e-08	0.270154	0.9796	0.930752	0.0189	0.0001435	0.260038	0.973	0.946486	0.0134	4.018e-05	0	1	40	32.256	PTPRK
2	73129974	73168593	rs2077586	A	G	1.0634	0.011083	2.96e-08	0.307332	0.931	1.0521	0.0186	0.006296	0.265461	0.905	1.06962	0.0138	1.111e-06	0.508	0.4758	15	38.62	EMX1
11	134282729	134297345	rs893949	C	T	1.0548	0.0096316	2.98e-08	0.474492	1	1.0677	0.0164	6.843e-05	0.44477	0.964	1.04812	0.0119	7.957e-05	0.834	0.361	6	14.617	none
1	190585303	190719743	rs55770408	T	C	0.94093	0.010988	3.02e-08	0.241412	0.988	0.9325	0.0192	0.000279	0.246231	0.998	0.94507	0.0134	2.45e-05	0.327	0.5674	19	134.441	LOC440704
1	200250436	200421466	rs6678676	T	C	0.93673	0.011821	3.22e-08	0.212718	0.9586	0.9347	0.0207	0.001129	0.287154	0.786	0.93772	0.0144	7.727e-06	0.016	0.8982	48	171.031	LINC00862, ZNF281
1	66205718	66552709	rs12129719	G	A	0.94723	0.0098185	3.35e-08	0.446915	0.9765	0.941	0.0168	0.0002945	0.476383	0.958	0.950471	0.0121	2.554e-05	0.234	0.6286	80	346.992	PDE4B
8	8092025	10283602	rs11993663	C	A	0.94626	0.010008	3.4e-08	0.330086	0.9985	0.9271	0.0175	1.498e-05	0.345962	0.994	0.955712	0.0122	0.0002035	2.03	0.1542	216	2191.58	CLDN23, ERI1, FAM86B3P, LINC00599, LOC157273, MFHAS1, MIR124-1, MIR597, MIR4660, MSRA, PPP1R3B, SGK223, TNKS
16	67841129	68419298	rs1975802	A	G	0.93292	0.012598	3.56e-08	0.166653	0.9851	0.9362	0.0222	0.002946	0.171655	1	0.93137	0.0153	3.347e-06	0.037	0.8479	134	578.17	CENPT, CTRL, DDX28, DPEP2, DPEP3, DUS2, EDC4, ESRP2, LCAT, LOC100131303, MIR6773, NFATC3, NRN1L, NUTF2, PLA2G15, PRMT7, PSKH1, PSMB10, SLC7A6, SLC7A6OS, SLC12A4, SMPD3, THAP11, TSNAXIP1
7	131619693	131627573	rs4523180	T	G	1.1068	0.018448	3.83e-08	0.0932041	0.9693	1.1	0.0292	0.001095	0.0737306	0.845	1.11127	0.0238	9.531e-06	0.073	0.7867	3	7.881	LOC101928782
22	39838892	39856356	rs9611177	C	T	1.0599	0.010581	3.84e-08	0.441188	0.8871	1.0654	0.0177	0.0003349	0.358731	0.842	1.05686	0.0132	2.732e-05	0.133	0.7155	19	17.465	MGAT3
1	97731961	97885249	rs11165867	C	T	0.9332	0.012578	3.87e-08	0.164193	0.9682	0.9311	0.0224	0.001463	0.182116	0.993	0.934169	0.0152	7.16e-06	0.015	0.9032	193	153.289	DPYD, DPYD-AS1
4	143629150	143924146	rs13121251	T	C	1.0591	0.01047	4.06e-08	0.311549	0.9732	1.0921	0.0182	1.241e-06	0.292731	0.99	1.04321	0.0128	0.0009338	4.237	0.03955	337	294.997	INPP4B
16	71003590	71575281	rs2161711	A	G	1.0724	0.012752	4.22e-08	0.184511	0.9903	1.091	0.0216	5.562e-05	0.162307	0.991	1.06258	0.0158	0.0001256	0.973	0.324	68	571.692	CALB2, CHST4, CMTR2, HYDIN, ZNF19, ZNF23
5	86909526	88224419	rs254782	A	G	0.88183	0.022975	4.4e-08	0.0534186	0.9695	0.9082	0.0381	0.01144	0.0495458	0.939	0.8671	0.0288	7.333e-07	0.94	0.3322	76	1314.89	LINC00461, LOC102546226, MEF2C, MEF2C-AS1, MIR9-2, TMEM161B, TMEM161B-AS1
2	57950104	58450569	rs77011057	A	G	1.1163	0.020109	4.48e-08	0.0659904	1	1.0863	0.0336	0.01379	0.0574612	0.999	1.13338	0.0251	5.883e-07	1.023	0.3117	48	500.466	FANCL, VRK2
14	59585932	60088992	rs150437760	A	C	1.129	0.022196	4.58e-08	0.0521468	0.9894	1.1636	0.0384	7.984e-05	0.0503074	0.955	1.11204	0.0272	9.218e-05	0.928	0.3355	226	503.061	CCDC175, DAAM1, GPR135, JKAMP, L3HYPDH, RTN1
17	78456708	78704618	rs7225476	G	A	0.94934	0.0095271	4.86e-08	0.466935	0.9868	0.9394	0.0167	0.0001727	0.453192	1	0.95418	0.0116	4.969e-05	0.589	0.4426	147	247.911	RPTOR
16	24235580	24249959	rs198160	G	T	1.0576	0.010258	4.88e-08	0.462157	0.9006	1.0488	0.0174	0.006302	0.457038	0.844	1.06226	0.0127	2.036e-06	0.35	0.5539	20	14.38	none

## Sheet: Supp Table 4
Supplementary Data Table 4: Independent genome-wide significant association signals from the CLOZUK + PGC meta-analysis, clumped and amalgamated into loci.
If the locus has no overlapping genes, the closest to the locus in a 500 KB radius is shown in red.
For additional details of each index SNP (OR, SE, MAF, INFO and P-value in individual studies) see Extended Data Table 5.
* These loci were not found in PGC2 but have been reported as genome-wide significant in other schizophrenia studies (see main text).
NOTE: Loci highlighted in yellow are novel, not identified in PGC2 GWAS.
Locus	GWS in PGC2?	Chromosome	Start (BP)	End (BP)	Index SNP (dbSNP b141)	A1	A2	OR	SE	P-value	Number of SNPs	Length (KB)	Gene(s) tagged
1	Yes	6	24988105	33842877	rs3130820	T	A	1.2806	0.017695	2.12e-44	12997	8854.77	xMHC
2	Yes	12	2321868	2523772	rs2007044	A	G	0.91513	0.0096913	5.63e-20	80	201.904	CACNA1C, CACNA1C-AS4, CACNA1C-IT3
3	Yes	7	1877502	2190100	rs10650434	A	ACT	0.918145	0.0097	1.1e-18	216	312.598	MAD1L1, MIR4655
4	Yes	1	98341152	98559093	rs2660304	G	T	0.89739	0.012376	2.18e-18	189	217.941	DPYD, MIR137, MIR137HG, MIR2682
5	Yes	10	104570118	105059896	rs12416331	T	A	1.1566	0.016888	7.09e-18	386	489.778	AS3MT, C10orf32, C10orf32-ASMT, CNNM2, CYP17A1, INA, NT5C2, PCGF6, RPEL1, WBP1L
6	Yes	8	143276678	143358316	rs58033671	A	ACCCCTGCACGCCCG	1.0873	0.0097	8.65e-18	33	81.638	LINC00051, MIR4472-1, TSNARE1
7	Yes	2	200547937	201309547	rs2949006	T	G	1.1053	0.011892	3.69e-17	194	761.61	C2orf47, C2orf69, FTCDNL1, TYW5, SPATS2L
8	Yes	20	37361504	37485986	rs6065094	A	G	0.91843	0.010211	7.91e-17	53	124.482	ACTR5, PPP1R16B, SLC32A1
9	Yes	4	103001649	103198082	rs13107325	C	T	0.85248	0.019267	1.19e-16	7	196.433	BANK1, SLC39A8
10	Yes	2	233559312	233790649	rs4144797	T	C	1.0852	0.010059	4.33e-16	64	231.337	C2orf82, EFHD1, GIGYF2, KCNJ13, NGEF
11	Yes	12	123447928	123902361	rs2851447	G	C	1.0911	0.010765	5.55e-16	361	454.433	ABCB9, ARL6IP4, C12orf65, CDK2AP1, LOC100507091, MIR4304, MIR8072, MPHOSPH9, OGFOD2, PITPNM2, RILPL2, SBNO1, SETD8
12	Yes	11	124610011	124620147	rs12293670	A	G	1.0841	0.010137	1.7e-15	11	10.136	ESAM, MSANTD2, NRGN, VSIG2
13	Yes	1	73736562	73991651	rs12129573	C	A	0.9264	0.0098601	8.94e-15	204	255.089	LOC101927295
14	Yes	22	42315790	42689370	rs6002655	C	T	0.92769	0.0098227	2.15e-14	119	373.58	CENPM, LINC00634, MIR33A, SEPT3, SHISA8, SREBF2, TNFRSF13C, CYP2D6, CYP2D7P, FAM109B, LOC388906, LOC101929829, NAGA, NDUFA6, NDUFA6-AS1, SEPT3, SMDT1, TCF20, WBP2NL
15	Yes	12	110723245	110723245	rs4766428	C	T	0.92666	0.010005	2.68e-14	2	0	ATP2A2
16	Yes	14	104188920	104537680	rs10083370	G	A	1.078	0.0099099	3.44e-14	188	348.76	LINC00637, PPP1R13B, XRCC3, ZFYVE21, ASPG, C14orf2, RD3L, TDRD9
17	Yes	7	86403263	86948073	rs12704290	G	A	1.1207	0.015044	3.57e-14	214	544.81	DMTF1, KIAA1324L, TMEM243, TP53TG1, GRM3
18	Yes	5	60563907	60843706	rs7701440	T	C	0.93016	0.0095633	3.72e-14	41	279.799	ZSWIM6
19	Yes	18	52747689	53804156	rs5825114	G	GA	0.929694	0.0097	5.03e-14	164	602.184	TCF4, LOC101927273, LOC100505474
20	Yes	11	133822133	133853008	rs4936215	A	G	1.0956	0.012135	5.32e-14	36	30.875	IGSF9B
21	Yes	11	46342942	46751495	rs7951870	T	C	0.9109	0.012793	2.99e-13	133	408.553	AMBRA1, ARHGAP1, ATG13, CHRM4, CKAP5, CREB3L1, DGKZ, F2, HARBI1, MDK, MIR3160-1, MIR3160-2, MIR4688, ZNF408
22	Yes	2	198146381	198940251	rs6434928	G	A	1.0757	0.010044	3.62e-13	376	793.87	ANKRD44, ANKRD44-IT1, BOLL, COQ10B, HSPD1, HSPE1, HSPE1-MOB4, MARS2, MOB4, PLCL1, RFTN2, SF3B1
23	Yes	10	18538669	18751891	rs7893279	T	G	1.1177	0.015387	4.8e-13	70	213.222	CACNB2
24	Yes	16	29924422	30117253	rs11646127	G	C	1.0733	0.0098036	5.52e-13	108	192.831	ALDOA, ASPHD1, C16orf92, DOC2A, FAM57B, GDPD3, HIRIP3, INO80E, KCTD13, MAPK3, PPP4C, SEZ6L2, TAOK2, TBX6, TMEM219, YPEL3
25	Yes	22	41408754	41684093	rs9607782	T	A	0.92208	0.01125	5.54e-13	104	275.339	CHADL, EP300, EP300-AS1, L3MBTL2, MIR1281, MIR6889, RANGAP1, ZC3H7B
26	Yes	6	84264202	84409255	rs217287	C	T	1.0715	0.009675	9.53e-13	59	145.053	SNAP91
27	Yes	X	68377126	68377205	rs62606711	A	G	1.07476	0.0101978	1.264e-12	4	0.079	PJA1
28	Yes	22	39840130	40091818	rs5757730	A	G	0.93125	0.010101	1.76e-12	49	251.688	LOC100506472, MGAT3, TAB1, CACNA1I, RPS19BP1
29	Yes	2	57950104	58484172	rs7596038	C	T	1.0695	0.0095823	2.37e-12	144	534.068	FANCL, VRK2
30	Yes	3	2435850	2540632	rs35346733	C	T	1.0752	0.010352	2.42e-12	22	104.782	CNTN4
31	Yes	11	113317745	113451229	rs2514218	G	A	0.91673	0.012407	2.42e-12	58	133.484	DRD2, MIR4301
32	Yes	15	91416550	91429042	rs17514846	A	C	0.9335	0.0098306	2.55e-12	11	12.492	FES, FURIN, MAN2A2
33	No	3	52965713	53175017	rs1080500	G	A	1.075	0.01034	2.71e-12	28	209.304	RFT1, SFMBT1
34	Yes	15	78802586	78926726	rs3743078	C	G	0.92481	0.01121	3.11e-12	71	124.14	CHRNA3, CHRNA5, CHRNB4, HYKK, IREB2, PSMA4
35	Yes	3	180571624	181207851	rs34796896	G	A	1.0868	0.01195	3.19e-12	294	636.227	DNAJC19, FXR1, LOC101928882, SOX2-OT
36	Yes	3	135807609	136615268	rs7432375	G	A	0.92281	0.011584	4.07e-12	120	807.659	MSL2, NCK1, NCK1-AS1, PCCB, PPP2R3A, SLC35G2, STAG1
37	Yes	8	111460027	111630275	rs36043959	G	A	1.0702	0.0097843	4.07e-12	59	170.248	KCNV1
38	Yes	2	199908378	200244409	rs1451488	A	G	0.93506	0.0097121	4.75e-12	155	336.031	SATB2
39	Yes	1	30428943	30459412	rs6694545	A	G	1.0798	0.011172	6.2e-12	46	30.469	LOC101929406
40	Yes	19	19358332	19657632	rs2905432	G	A	1.071	0.0099892	6.62e-12	155	299.3	CILP2, GATAD2A, HAPLN4, MAU2, NCAN, NDUFA13, PBX4, SUGP1, TM6SF2, TSSK6, YJEFN3
41	Yes	1	2372397	2402499	rs4648845	C	T	0.92646	0.01113	6.74e-12	27	30.102	PLCH2
42	Yes	8	27327841	27453762	rs11783093	C	T	1.0976	0.013607	7.64e-12	26	125.921	CHRNA2, PTK2B, CLU, EPHX2, MIR6843
43	Yes	5	151924995	152847217	rs111294930	A	G	1.0858	0.012069	9.04e-12	467	922.222	LOC101927134
44	Yes	4	176717618	176904037	rs62334820	C	T	0.92209	0.011906	9.6e-12	51	186.419	GPM6A
45	Yes	2	146416874	146441828	rs56807175	T	TC	0.916127	0.0129	1.36e-11	29	24.954	U80770
46	Yes	1	44029353	44137257	rs2970610	T	C	1.0702	0.010045	1.39e-11	73	107.904	KDM4A, PTPRF
47	Yes	5	88580998	88748452	rs16867576	A	G	1.1063	0.014996	1.65e-11	13	167.454	AL050132
48	Yes	11	130794253	130894131	rs35774874	T	C	1.0714	0.010276	1.97e-11	95	99.878	SNX19
49	Yes	12	57483524	57682956	rs61937595	C	T	1.1331	0.018836	3.28e-11	7	199.432	NAB2, STAT6, TMEM194A, LRP1, NDUFA4L2, NXPH4, R3HDM2, SHMT2, STAC3
50	Yes	8	60475926	60954059	rs1473594	T	C	1.0661	0.0096561	3.33e-11	264	478.133	CA8
51	Yes	19	50106208	50182697	rs7508148	T	C	1.0802	0.011683	4.06e-11	29	76.489	ADM5, BCL2L12, CPT1C, IRF3, MIR5088, PRMT1, PRR12, PRRG2, RRAS, SCAF1
52	Yes	7	110850439	111180544	rs12705761	G	C	1.0677	0.0099709	5.11e-11	81	330.105	IMMP2L
53	Yes	5	44960923	45285752	rs16902086	A	G	0.93616	0.010063	5.55e-11	9	324.829	HCN1
54	Yes	7	104597669	105063372	rs7789569	T	C	1.0674	0.010005	7e-11	117	465.703	KMT2E, KMT2E-AS1, LINC01004, SRPK2
55	Yes	7	137039670	137085250	rs3735025	T	C	1.0667	0.0098965	7.02e-11	58	45.58	DGKI, PTN
56	Yes	9	84607758	84813653	rs1319017	G	A	0.93575	0.01021	7.82e-11	15	205.895	SPATA31D1
57	Yes	3	36843149	36945794	rs75968099	C	T	0.93637	0.010152	9.41e-11	41	102.645	TRANK1
58	Yes	3	63792668	64003983	rs704373	A	G	1.0667	0.010063	1.39e-10	43	211.315	ATXN7, C3orf49, PSMD6, PSMD6-AS2, THOC7, THOC7-AS1
59	Yes	14	72417326	72450533	rs2332700	C	G	1.0725	0.010931	1.52e-10	4	33.207	RGS6
60	Yes	1	243503764	243685760	rs14403	C	T	1.077	0.011617	1.71e-10	60	181.996	MIR4677, SDCCAG8, AKT3
61	Yes	X	5859733	6029533	rs12009217	A	G	0.936974	0.0101978	1.781e-10	51	169.801	NLGN4X
62	Yes	19	30981639	31038995	rs2053079	A	G	0.93172	0.011092	1.82e-10	23	57.356	ZNF536
63	Yes	16	58538662	58684945	rs42945	A	G	0.93882	0.0099526	2.25e-10	81	146.283	CNOT1, NDRG4, SETD6, SLC38A7, SNORA46, SNORA76A
64	No	11	132387460	132581442	rs2917569	T	C	1.0629	0.0096913	3.11e-10	110	193.982	OPCML
65	Yes	6	73132745	73171881	rs1339227	C	T	1.0647	0.010008	3.76e-10	22	39.136	RIMS1
66	Yes	14	30000405	30190316	rs1191551	T	G	1.0756	0.011657	4.12e-10	19	189.911	MIR548AI, PRKD1
67	Yes	16	13730867	13763942	rs7499750	A	C	1.0731	0.011303	4.24e-10	45	33.075	ERCC4
68	Yes	17	2059961	2216258	rs7216638	T	A	1.0667	0.010358	4.59e-10	188	156.297	LOC101927839, SMG6, SNORD91A, SNORD91B, SRR, TSR1
69	No	1	239198959	239210058	rs72769124	C	A	0.89692	0.017468	4.73e-10	3	11.099	CHRM3
70	No	14	29469373	29490300	rs10148671	T	C	0.93862	0.010208	5.46e-10	5	20.927	FOXG1
71	No*	8	38014429	38310910	rs10156310	A	T	1.0755	0.01173	5.56e-10	203	296.481	ASH2L, BAG4, DDHD2, FGFR1, LETM2, LSM1, PPAPDC1B, STAR, WHSC1L1
72	No	1	190606775	191091298	rs28374258	T	A	0.92924	0.011873	6.35e-10	121	484.523	LOC440704
73	No*	2	145139727	145186749	rs12991836	A	C	0.94079	0.0098773	6.46e-10	4	47.022	ZEB2
74	Yes	1	149998923	150214166	rs140505938	C	T	1.0873	0.013541	6.5e-10	227	215.243	ANP32E, CA14, OTUD7B, PLEKHO1, VPS45
75	Yes	5	137838122	137948140	rs13169274	T	C	0.9421	0.009675	7.06e-10	78	110.018	ETF1, HSPA9, SNORD63
76	No	19	11849736	11849736	rs72986630	C	T	0.8693	0.0228	8.09e-10	2	0	ZNF823
77	No	15	82827938	83391537	rs783540	A	G	0.94268	0.0096196	8.45e-10	93	563.599	ADAMTS7P1, AP3B2, CPEB1, GOLGA6L9, GOLGA6L10, GOLGA6L17P, LOC80154, LOC283692, LOC283693, LOC338963, LOC727751, LOC102724034, RPS17, UBE2Q2P2
78	Yes	15	84703470	85392298	rs12908161	A	G	1.0689	0.010896	9.41e-10	120	688.828	ADAMTSL3, ALPK3, DNM1P41, EFTUD1P1, GOLGA2P7, GOLGA6L4, GOLGA6L5P, LINC00933, LOC440300, LOC642423, LOC102724034, LOC103171574, NMB, SCAND2P, SEC11A, UBE2Q2L, UBE2Q2P1, WDR73, ZNF592, ZSCAN2
79	No	2	73552542	73900900	rs56145559	C	T	0.93086	0.01173	1.01e-09	282	348.358	ALMS1, ALMS1-IT1, ALMS1P, NAT8
80	No	9	101065115	101076627	rs10985817	T	C	0.92304	0.013116	1.02e-09	24	11.512	GABBR2
81	Yes	11	24367339	24412992	rs1899543	A	T	0.94397	0.0094896	1.23e-09	76	45.653	LUZP2
82	Yes	11	57385856	57681828	rs7129727	G	A	0.93938	0.010341	1.47e-09	99	295.972	BTBD18, C11orf31, CLP1, CTNND1, MED19, MIR130A, SERPING1, TMX2, TMX2-CTNND1, YPEL4, ZDHHC5
83	No	18	77566535	77579812	rs56775891	C	T	0.93556	0.011111	2.03e-09	10	13.277	KCNG2
84	Yes	3	17221017	17888256	rs11409090	A	AT	0.941859	0.01	2.11e-09	505	667.239	TBC1D5
85	Yes	7	110034378	110106697	rs211829	T	C	1.0608	0.0098773	2.29e-09	28	72.319	IMMP2L
86	Yes	15	61831680	61909712	rs12898315	G	A	0.94469	0.0095456	2.51e-09	48	78.032	VPS13C
87	Yes	1	8392592	8701288	rs34269918	G	GA	0.941294	0.0102	3.27e-09	56	308.696	RERE, SLC45A1
88	No	8	26190836	26279173	rs1042992	C	T	0.9293	0.012431	3.67e-09	22	88.337	BNIP3L, PPP2R2A
89	Yes	2	225334070	225467840	rs11685299	C	A	1.0622	0.010248	3.86e-09	48	133.77	CUL3
90	No	16	63692643	63712719	rs17465671	C	A	1.0592	0.0097843	4.14e-09	27	20.076
91	Yes	2	185601420	185785791	rs10196799	A	T	1.0577	0.0095633	4.51e-09	6	184.371	ZNF804A
92	No	12	39448519	39533484	rs10783624	C	A	1.0615	0.01023	5.44e-09	40	84.965	CPNE8
93	No	3	60287845	60293004	rs1353545	G	C	0.94265	0.010137	5.67e-09	9	5.159	FHIT
94	Yes	7	131539274	131627162	rs7801375	A	G	0.92557	0.013314	6.27e-09	24	87.888	LOC101928782
95	Yes	16	9875513	9960879	rs7191183	T	C	0.94221	0.010248	6.31e-09	154	85.366	GRIN2A
96	Yes	8	89221915	89462854	rs7010876	T	A	1.0641	0.01071	6.51e-09	70	240.939	MMP16
97	No	20	20817745	20830612	rs6035706	A	G	0.94205	0.010319	7.24e-09	18	12.867	RALGAPA2
98	No	12	103361112	103382325	rs36104021	C	G	1.0945	0.015612	7.31e-09	13	21.213	ASCL1
99	No	6	143645035	143707354	rs72342102	T	TTTTG	1.06673	0.0112	7.93e-09	16	62.319	AIG1
100	No	2	22621296	22753225	rs12712510	T	C	1.0593	0.010002	8.18e-09	115	131.929	LOC102723362
101	Yes	8	4177791	4208761	rs139425113	G	GA	0.935569	0.0116	8.48e-09	18	30.97	CSMD1
102	No	14	33292743	33309495	rs34179565	CA	C	0.945728	0.0097	8.88e-09	43	16.752	AKAP6
103	No	6	83789798	83897565	rs4470825	G	A	1.0572	0.009675	8.94e-09	5	107.767	DOPEY1, PGM3, RWDD2A, UBE3D
104	No	3	71481192	71611630	rs7632921	G	T	1.0582	0.0098513	9.52e-09	104	130.438	FOXP1, MIR1284
105	No	8	18396405	18429406	rs2410572	G	A	1.0561	0.0095456	1.07e-08	35	33.001	PSD3
106	No	11	30240470	30395895	rs1765142	C	A	0.94407	0.010078	1.13e-08	82	155.425	ARL14EP, FSHB, MPPED2
107	No	13	79855297	80162555	rs9545047	A	C	1.0576	0.0098044	1.15e-08	329	307.258	NDFIP2, NDFIP2-AS1, RBM26, RBM26-AS1
108	Yes	1	177237533	177334782	rs4650963	T	C	1.0557	0.0095085	1.16e-08	47	97.249	BRINP2
109	Yes	15	70573650	70618956	rs12148337	G	T	0.92098	0.014429	1.16e-08	27	45.306	TLE3
110	No	3	161394234	161518228	rs489939	G	A	1.0587	0.010025	1.24e-08	96	123.994	OTOL1
111	No	6	93063529	93165206	rs634940	G	T	0.93865	0.011134	1.3e-08	10	101.677	BC037927
112	No	8	34257317	34386259	rs55669358	T	C	0.90946	0.016715	1.37e-08	8	128.942	LINC01288
113	No	3	53443354	53538107	rs312477	G	A	1.0674	0.011499	1.38e-08	13	94.753	CACNA1D
114	Yes	4	23366446	23443426	rs215411	T	A	0.94382	0.010191	1.4e-08	62	76.98	MIR548AJ2
115	Yes	12	23477601	23637351	rs1120004	T	G	1.0636	0.010877	1.42e-08	122	159.75	SOX5
116	No	16	7744180	7744180	rs12447542	G	A	0.91818	0.015058	1.44e-08	2	0	RBFOX1
117	No	17	19014831	19183427	rs66885728	G	C	1.0913	0.015428	1.47e-08	5	168.596	EPN2, EPN2-AS1, EPN2-IT1, GRAPL, LOC79999, LOC388436
118	Yes	7	24719606	24799227	rs146678232	CA	C	0.931555	0.0126	1.63e-08	6	79.621	DFNA5, MPP6
119	Yes	14	99700080	99719219	rs35604463	G	A	1.0577	0.0099449	1.66e-08	20	19.139	BCL11B
120	No	5	49441779	49884022	rs77853293	C	T	1.0561	0.0096913	1.77e-08	216	442.243	EMB
121	No	6	114679177	114722063	rs760608	G	A	1.0626	0.010803	1.9e-08	12	42.886	HS3ST5
122	No	3	10800703	10807667	rs6800435	C	A	0.92097	0.014669	2e-08	9	6.964	LINC00606
123	No	11	65378028	65485218	rs58950470	G	T	0.94418	0.010245	2.07e-08	23	107.19	EHBP1L1, KAT5, KCNK7, MAP3K11, MIR4489, MIR4690, PCNXL3, RELA, RNASEH2C, SIPA1
124	Yes	12	92243186	92258265	rs4240748	C	G	0.9458	0.0099509	2.15e-08	19	15.079	BTG1
125	No	15	47686081	47686081	rs281299	C	T	0.94633	0.0098579	2.19e-08	2	0	SEMA6D
126	Yes	15	40566759	40602256	rs56282503	T	C	0.93958	0.011152	2.3e-08	15	35.497	ANKRD63, PAK6, PLCB2
127	No	1	173867252	174613056	rs6701877	G	T	1.076	0.013116	2.37e-08	66	745.804	GPR52, RABGAP1L, RC3H1, SERPINC1, ZBTB37
128	Yes	17	17649172	17967397	rs4925114	A	G	1.0582	0.010172	2.64e-08	174	318.225	ATPAF2, GID4, LRRC48, MIR33B, MIR6777, RAI1, SMCR5, SREBF1, TOM1L2
129	No	3	16845144	16876476	rs9881798	T	C	1.0544	0.0095441	2.81e-08	34	31.332	PLCL2
130	Yes	4	170357792	170646003	rs10520163	A	C	0.94751	0.0097107	2.81e-08	44	288.211	C4orf27, CLCN3, NEK1
131	No	1	95837686	95889947	rs6680011	A	C	0.92911	0.013245	2.83e-08	23	52.261	FLJ31662
132	No	6	128301981	128333682	rs35736453	T	TC	0.9412	0.0109	2.95e-08	25	31.701	PTPRK
133	No	2	73161551	73168593	rs2077586	A	G	1.0634	0.011083	2.96e-08	8	7.042	EMX1, SFXN5
134	No	11	134290032	134297345	rs893949	C	T	1.0548	0.0096316	2.98e-08	6	7.313	B3GAT1, LOC283177
135	No	1	200253612	200269903	rs6678676	T	C	0.93673	0.011821	3.22e-08	21	16.291	LINC00862
136	No	1	66304167	66333877	rs12129719	G	A	0.94723	0.0098185	3.35e-08	23	29.71	PDE4B
137	No	8	10030698	10057705	rs11993663	C	A	0.94626	0.010008	3.4e-08	41	27.007	MSRA
138	Yes	16	67708897	68305708	rs1975802	A	G	0.93292	0.012598	3.56e-08	218	596.811	ACD, C16orf86, CENPT, CTRL, DDX28, DPEP2, DPEP3, DUS2, EDC4, ENKD1, ESRP2, GFOD2, LCAT, LOC100131303, MIR6773, NFATC3, NRN1L, NUTF2, PARD6A, PLA2G15, PSKH1, PSMB10, RANBP10, RLTPR, SLC7A6, SLC12A4, THAP11, TSNAXIP1
139	Yes	1	97800233	97885249	rs11165867	C	T	0.9332	0.012578	3.87e-08	77	85.016	DPYD, DPYD-AS1
140	No	4	143742567	143883013	rs13121251	T	C	1.0591	0.01047	4.06e-08	226	140.446	INPP4B
141	No	16	71216588	71392062	rs2161711	A	G	1.0724	0.012752	4.22e-08	38	175.474	CALB2, CMTR2, HYDIN
142	No	5	87676693	88195380	rs254782	A	G	0.88183	0.022975	4.4e-08	15	518.687	LINC00461, LOC102546226, MEF2C, MEF2C-AS1, MIR9-2, TMEM161B-AS1
143	No	14	59864362	60033892	rs150437760	A	C	1.129	0.022196	4.58e-08	103	169.53	CCDC175, GPR135, JKAMP, L3HYPDH
144	No	17	78557051	78685626	rs7225476	G	A	0.94934	0.0095271	4.86e-08	26	128.575	RPTOR
145	No	16	24238065	24240725	rs198160	G	T	1.0576	0.010258	4.88e-08	3	2.66	PRKCB

## Sheet: Supp Table 5
Supplementary Data Table 5: Independent genome-wide significant association signals from the PGC study, and their corresponding statistics in the CLOZUK + PGC meta-analysis.
If the locus has no overlapping genes, the closest to the locus in a 500 KB radius is shown in red.
PGC2 Locus	GWS in Meta-analysis?	Chromosome	Start (BP)	End (BP)	PGC2 P-value	Meta-analysis P-value	Index SNP (Meta-analysis)	Gene(s)
1	Yes	6	28303247	28712247	3.48e-31	4.32e-44	rs1233578	xMHC
4	Yes	12	2321860	2523731	3.22e-18	5.63e-20	rs2007044	CACNA1C
7	Yes	7	1896096	2190096	8.2e-15	1.098e-18	rs10650434	MAD1L1
2	Yes	1	97792625	98559084	3.36e-19	2.18e-18	rs2660304	DPYD, MIR137
3	Yes	10	104423800	105165583	6.2e-19	7.09e-18	rs12416331	ARL3, AS3MT, C10orf32, CNNM2, CYP17A1, INA, NT5C2, PCGF6, PDCD11, SFXN2, TAF5, TRIM8, USMG5, WBP1L
5	Yes	8	143309503	143330533	1.74e-15	8.649e-18	rs58033671	TSNARE1
10	Yes	2	200715237	200848037	5.65e-14	3.69e-17	rs2949006	AC073043.2, C2orf47, C2orf69, TYW5
27	Yes	20	37361494	37485994	1.46e-11	7.91e-17	rs6065094	ACTR5, PPP1R16B, SLC32A1
6	Yes	4	103146888	103198090	7.98e-15	1.19e-16	rs13107325	SLC39A8
22	Yes	2	233559301	233753501	2.32e-12	4.33e-16	rs4144797	C2orf82, EFHD1, GIGYF2, KCNJ13, NGEF
9	Yes	12	123448113	123909113	1.86e-14	5.55e-16	rs2851447	ABCB9, ARL6IP4, C12orf65, CDK2AP1, MPHOSPH9, OGFOD2, PITPNM2, RILPL2, SBNO1, SETD8
23	Yes	11	124610007	124620147	2.8e-12	1.7e-15	rs12293670	ESAM, MSANTD2, NRGN, VSIG2
21	Yes	1	73766426	73991366	2.03e-12	8.94e-15	rs12129573	LRRIQ3
57	Yes	22	42315744	42689414	1.71e-09	2.15e-14	rs6002655	CENPM, CYP2D6, FAM109B, NAGA, NDUFA6, SEPT3, SHISA8, SMDT1, SREBF2, TCF20, TNFRSF13C, WBP2NL
54	Yes	12	110723245	110723245	1.4e-09	2.68e-14	rs4766428	ATP2A2
44	Yes	7	86403226	86459326	3.33e-10	3.57e-14	rs12704290	GRM3
8	Yes	5	60499143	60843543	1.1e-14	3.72e-14	rs7701440	ZSWIM6
24	Yes	18	52747686	53200117	3.34e-12	5.027e-14	rs5825114	TCF4
36	Yes	11	133808069	133852969	3.87e-11	5.32e-14	rs4936215	IGSF9B
13	Yes	14	103996234	104184834	1.36e-13	7.31e-14	rs71417868	AL049840.1, APOPT1, BAG5, CKB, KLC1, PPP1R13B, TRMT61A, XRCC3, ZFYVE21
25	Yes	11	46342943	46751213	1.26e-11	2.99e-13	rs7951870	AMBRA1, ARHGAP1, ATG13, CHRM4, CKAP5, CREB3L1, DGKZ, F2, HARBI1, MDK, ZNF408
31	Yes	2	198148577	198835577	2.06e-11	3.62e-13	rs6434928	ANKRD44, BOLL, COQ10B, HSPD1, HSPE1, MARS2, PLCL1, RFTN2, SF3B1
19	Yes	10	18681005	18770105	1.97e-12	4.8e-13	rs7893279	CACNB2
30	Yes	18	53453389	53804154	1.97e-11	5.03e-13	rs144158419	TCF4
38	Yes	16	29924377	30144877	4.55e-11	5.52e-13	rs11646127	ALDOA, ASPHD1, C16orf92, DOC2A, FAM57B, GDPD3, HIRIP3, INO80E, KCTD13, MAPK3, PPP4C, SEZ6L2, TAOK2, TBX6, TMEM219, YPEL3
32	Yes	22	41408556	41675156	2.07e-11	5.54e-13	rs9607782	CHADL, EP300, L3MBTL2, RANGAP1
49	Yes	6	84279922	84407274	8.15e-10	1.17e-12	rs217331	SNAP91
42	Yes	X	68377126	68379036	1.98e-10	1.26e-12	rs62606711	PJA1
28	Yes	2	57943593	58502192	1.47e-11	2.37e-12	rs7596038	FANCL, VRK2
35	Yes	11	113317794	113423994	2.75e-11	2.42e-12	rs2514218	DRD2
34	Yes	3	2532786	2561686	2.69e-11	2.68e-12	rs66610175	CNTN4
11	Yes	15	91416560	91429040	8.3e-14	2.72e-12	rs4702	FES, FURIN, MAN2A2
39	Yes	22	39975317	40016817	4.73e-11	2.782e-12	rs71695442	CACNA1I
14	Yes	15	78803032	78926732	2.44e-13	3.11e-12	rs3743078	AC027228.1, AGPHD1, CHRNA3, CHRNA5, CHRNB4, IREB2, PSMA4
26	Yes	3	180588843	181205585	1.3e-11	3.19e-12	rs34796896	CCDC39, DNAJC19, FXR1
33	Yes	8	111460061	111630761	2.61e-11	4.07e-12	rs36043959	KCNV1
40	Yes	3	135807405	136615405	7.26e-11	4.07e-12	rs7432375	MSL2, NCK1, PCCB, PPP2R3A, SLC35G2, STAG1
61	Yes	1	30412551	30437271	2.86e-09	6.2e-12	rs6694545
47	Yes	19	19374022	19658022	3.63e-10	6.62e-12	rs2905432	CILP2, GATAD2A, HAPLN4, MAU2, NCAN, NDUFA13, PBX4, SUGP1, TM6SF2, TSSK6
50	Yes	1	2372401	2402501	8.7e-10	6.74e-12	rs4648845	PLCH2
90	Yes	8	27412627	27453627	2.1e-08	7.64e-12	rs11783093	CLU, EPHX2
41	Yes	5	151941104	152797656	1.06e-10	9.04e-12	rs111294930	GRIA1
78	Yes	4	176851001	176875801	9.47e-09	9.6e-12	rs62334820	GPM6A
37	See locus 33 in ED Table 6	3	52541105	52903405	4.26e-11	1.01e-11	rs3617	GLT8D1, GNL3, ITIH1, ITIH3, ITIH4, MUSTN1, NEK4, NISCH, NT5DC2, PBRM1, SMIM4, SPCS1, STAB1, TMEM110, TMEM110-MUSTN1
58	Yes	2	146416922	146441832	1.81e-09	1.363e-11	rs56807175
46	Yes	1	44029384	44128084	3.39e-10	1.39e-11	rs2970610	KDM4A, PTPRF
67	Yes	5	88581331	88854331	4.61e-09	1.65e-11	rs16867576	MEF2C
20	Yes	12	57428314	57682971	2.02e-12	3.28e-11	rs61937595	LRP1, MYO1A, NAB2, NDUFA4L2, NXPH4, R3HDM2, SHMT2, STAC3, STAT6, TAC3, TMEM194A
16	Yes	11	130714610	130749330	1.09e-12	3.29e-11	rs10791097	SNX19
73	Yes	8	60475469	60954469	5.97e-09	3.33e-11	rs1473594	CA8
15	Yes	7	110843815	111205915	3.03e-13	5.11e-11	rs12705761	IMMP2L
76	Yes	2	200161422	200309252	8.33e-09	6.16e-11	rs6704641	SATB2
52	Yes	7	104598064	105063064	1.13e-09	7e-11	rs7789569	MLL5, PUS7, SRPK2
62	Yes	7	137039644	137085244	3.28e-09	7.02e-11	rs3735025	DGKI, PTN
63	Yes	9	84630941	84813641	3.61e-09	7.82e-11	rs1319017	TLE1
12	Yes	3	36843183	36945783	1.05e-13	9.41e-11	rs75968099	TRANK1
84	Yes	3	63792650	64004050	1.43e-08	1.39e-10	rs704373	ATXN7, C3orf49, PSMD6, THOC7
71	Yes	14	72417326	72450526	4.86e-09	1.52e-10	rs2332700	AC005477.1 RGS6
64	Yes	1	243503719	244002945	3.73e-09	1.71e-10	rs14403	AKT3, SDCCAG8
91	Yes	X	5916533	6032733	2.21e-08	1.78e-10	rs12009217	NLGN4X
66	Yes	19	30981643	31039023	4.49e-09	1.82e-10	rs2053079	ZNF536
92	Yes	6	73132701	73171901	2.69e-08	3.76e-10	rs1339227	RIMS1
51	Yes	16	13728459	13761359	1.01e-09	4.24e-10	rs7499750	ERCC4
43	Yes	17	2095899	2220799	2.86e-10	4.59e-10	rs7216638	SGSM2, SMG6, SRR, TSR1
48	Yes	1	149998890	150242490	4.49e-10	6.5e-10	rs140505938	ANP32E, APH1A, C1orf51, C1orf54, CA14, OTUD7B, PLEKHO1, VPS45
69	Yes	5	137598121	137948092	4.67e-09	7.06e-10	rs13169274	CDC25C, CTNNA1, EGR1, ETF1, FAM53C, GFRA3, HSPA9, KDM3B, REEP2
72	Yes	5	45291475	45393775	5.05e-09	8.65e-10	rs6867827	HCN1
89	Yes	16	58669293	58682833	1.87e-08	1.15e-09	rs154437	CNOT1, SLC38A7
60	Yes	11	24367320	24412990	2.55e-09	1.23e-09	rs1899543	LUZP2
59	Yes	11	57386294	57682294	2.24e-09	1.47e-09	rs7129727	BTBD18, C11orf31, CLP1, CTNND1, MED19, SERPING1, TMX2, YPEL4, ZDHHC5
68	Yes	3	17221366	17888266	4.64e-09	2.112e-09	rs11409090	TBC1D5
98	Yes	7	110034393	110106693	3.71e-08	2.29e-09	rs211829	IMMP2L
45	Yes	15	61831663	61909663	3.38e-10	2.51e-09	rs12898315	VPS14C
106	Yes	19	50067499	50135399	4.69e-08	2.58e-09	rs56873913	NOSIP, PRR12, PRRG2, RCN3, RRAS, SCAF1
53	Yes	1	8411184	8638984	1.17e-09	3.268e-09	rs34269918	RERE, SLC45A1
80	Yes	2	225334096	225467796	1.12e-08	3.86e-09	rs11685299	CUL3
29	Yes	15	84661161	85153461	1.62e-11	4e-09	rs8025070	ADAMTSL3, GOLGA6L4, ZSCAN2
17	Yes	2	185601420	185785420	1.53e-12	4.51e-09	rs10196799	ZNF804A
100	Yes	7	131539263	131567263	4.42e-08	6.27e-09	rs7801375	PODXL
82	Yes	16	9875519	9970219	1.28e-08	6.31e-09	rs7191183	GRIN2A
83	Yes	14	30189985	30190316	1.41e-08	7.313e-09	rs199687649	PRKD1
79	Yes	8	4177794	4192544	1.06e-08	8.476e-09	rs139425113	CSMD1
88	Yes	15	70573672	70628872	1.79e-08	1.16e-08	rs12148337	TLE3
95	Yes	4	23366403	23443403	3.06e-08	1.4e-08	rs215411	MIR548AJ2
93	Yes	7	24619494	24832094	2.85e-08	1.631e-08	rs146678232	DFNA5, MPP6, OSBPL3
70	Yes	14	99707919	99719219	4.8e-09	1.66e-08	rs35604463	BCL11B
101	Yes	1	177247821	177300821	4.45e-08	1.82e-08	rs6670165	FAM5B
104	Yes	12	92243186	92258286	4.59e-08	2.15e-08	rs4240748	C12orf79
65	Yes	15	40566759	40602237	4.18e-09	2.3e-08	rs56282503	ANKRD63, PAK6, PLCB2
55	Yes	4	170357552	170646052	1.47e-09	2.81e-08	rs10520163	C4orf27, CLCN3, NEK1
87	Yes	17	17722402	18030202	1.77e-08	3.05e-08	rs12948749	ATPAF2, DRG2, GID4, LRRC48, MYO15A, RAI1, SREBF1, TOM1L2
85	Yes	16	67709340	68311340	1.51e-08	3.56e-08	rs1975802	ACD, C16orf86, CENPT, CTRL, DDX28, DPEP2, DPEP3, DUS2L, EDC4, ENKD1, ESRP2, GFOD2, LCAT, NFATC3, NRN1L, NUTF2, PARD6A, PLA2G15, PSKH1, PSMB10, RANBP10, SLC12A4, SLC7A6, SLC7A6OS, THAP11, TSNAXIP1
75	No	11	123394636	123395986	7.54e-09	5.02e-08	rs77502336	GRAMD1B
81	Yes	8	89340626	89753626	1.22e-08	7.59e-08	rs4246111	MMP16
103	No	20	48114136	48131649	4.56e-08	1.16e-07	rs7267348	KCNB1, PTGIS
102	No	1	207912183	208024083	4.47e-08	2.7e-07	rs10863593	C1orf132, CD46, CR1L
107	See locus 98 in ED Table 6	12	103559855	103616655	4.84e-08	3.49e-07	rs10860964	C12orf42
105	No	2	162798555	162910255	4.62e-08	3.759e-07	rs34685708	DPP4, SLC4A10
94	No	5	109030036	109209066	3.05e-08	5.89e-07	rs71575306	MAN2A1
108	No	5	140023664	140222664	4.85e-08	7.668e-07	rs70988775	AC005609.1, CD14, DND1, HARS, HARS2, IK, NDUFA2, PCDHA1, PCDHA10, PCDHA2, PCDHA3, PCDHA4, PCDHA5, PCDHA6, PCDHA7, PCDHA8, PCDHA9, TMCO6, WDR55, ZMAT2
86	No	2	149390778	149520178	1.59e-08	8.484e-07	rs200327371	EPC2
96	No	5	153671057	153688217	3.15e-08	1.01e-06	rs11740474	GALNT10
56	No	6	96459651	96459651	1.64e-09	1.09e-06	rs117074560	FUT9
99	No	12	29905265	29940365	3.91e-08	1.51e-06	rs679087	TMTC1
97	No	11	109285471	109610071	3.7e-08	6.55e-06	rs12421382	C11orf87
18	No	X	21193266	21570266	1.61e-12	3.81e-05	rs5904539	CNKSR2
77	No	2	193848340	194028340	8.41e-09	5.13e-05	rs59979824	PCGEM1
74	No	2	72357335	72368185	7.39e-09	0.000442	rs3768644	CYP26B1

## Sheet: Supp Table 6
Supplementary Data Table 6: Replication of 50 newly discovered loci in a combined independent sample (5,662 cases and 154,224 controls)
Heterogeneity Q-estimates (Cochran 1954) and associated p-values are given for the discovery/replication effect sizes of each index SNP.
NOTE: SNPs highlighted in yellow replicate at a nominal significance threshold (0.05).
Locus	SNP	Chromosome	BP	A1	A2	Discovery OR	Discovery SE	Discovery P-value	Replication OR	Replication SE	Replication P-value (1 sided)	Heterogeneity Q	Heterogeneity P-value
33	rs1080500	3	53175017	G	A	1.075	0.0103	2.71e-12	1.01421	0.023876	0.27733	15.2032	0.00429783
64	rs2917569	11	132568255	T	C	1.0629	0.0097	3.11e-10	1.05668	0.0226587	0.00748362	3.85082	0.426572
69	rs72769124	1	239210058	C	A	0.8969	0.0175	4.73e-10	0.933014	0.0400199	0.0415907	5.80352	0.21431
70	rs10148671	14	29469373	T	C	0.9386	0.0102	5.46e-10	0.967233	0.0233588	0.0768963	2.01154	0.733637
72	rs28374258	1	190949551	T	A	0.9292	0.0119	6.35e-10	0.980805	0.0279047	0.243668	5.08067	0.27912
76	rs72986630	19	11849736	C	T	0.8693	0.0228	8.09e-10	0.955319	0.0464596	0.162591	5.87113	0.208982
77	rs783540	15	83254708	A	G	0.9427	0.0096	8.45e-10	0.995096	0.0230187	0.415444	7.90252	0.0952148
79	rs56145559	2	73623439	C	T	0.9309	0.0117	1.01e-09	0.981672	0.0269379	0.246143	7.67008	0.104439
80	rs10985817	9	101071090	T	C	0.923	0.0131	1.02e-09	0.942532	0.0300746	0.0245369	6.4179	0.170038
83	rs56775891	18	77575613	C	T	0.9356	0.0111	2.03e-09	0.962597	0.0248852	0.0627779	1.49487	0.82755
88	rs1042992	8	26269191	C	T	0.9293	0.0124	3.67e-09	0.980927	0.0294692	0.256732	4.49332	0.34334
90	rs17465671	16	63712719	C	A	1.0592	0.0098	4.14e-09	1.03158	0.0226179	0.0846042	3.55948	0.468892
92	rs10783624	12	39522907	C	A	1.0615	0.0102	5.44e-09	1.05737	0.0243255	0.0109148	2.85752	0.581945
93	rs1353545	3	60287845	G	C	0.9427	0.0101	5.67e-09	0.989057	0.0237717	0.321728	3.9436	0.413692
97	rs6035706	20	20821005	A	G	0.9421	0.0103	7.24e-09	0.991357	0.0245352	0.361752	5.46766	0.242587
98	rs36104021	12	103361112	C	G	1.0945	0.0156	7.31e-09	1.07686	0.0365573	0.0214027	2.63562	0.620527
99	rs72342102	6	143650817	T	TTTTG	1.0667	0.0112	7.93e-09	1.04343	0.0259006	0.0503493	4.02714	0.402345
100	rs12712510	2	22749726	T	C	1.0593	0.01	8.18e-09	1.03025	0.0226095	0.0937493	3.37925	0.496474
102	rs34179565	14	33298731	CA	C	0.9457	0.0097	8.88e-09	0.976359	0.022431	0.143079	4.83334	0.30483
103	rs4470825	6	83789798	G	A	1.0572	0.0097	8.94e-09	1.02357	0.0225362	0.150621	8.47659	0.0755999
104	rs7632921	3	71543758	G	T	1.0582	0.0099	9.52e-09	1.04704	0.0227821	0.0218126	6.91566	0.140413
105	rs2410572	8	18421474	G	A	1.0561	0.0095	1.07e-08	1.06332	0.0225224	0.00320409	0.831154	0.934223
106	rs1765142	11	30378559	C	A	0.9441	0.0101	1.13e-08	0.960671	0.0238943	0.0465572	5.21375	0.26606
107	rs9545047	13	79859456	A	C	1.0576	0.0098	1.15e-08	1.10153	0.0229596	1.26654e-05	9.86951	0.0426841
110	rs489939	3	161470592	G	A	1.0587	0.01	1.24e-08	1.00896	0.0231942	0.350199	4.77455	0.311222
111	rs634940	6	93077500	G	T	0.9387	0.0111	1.3e-08	0.977669	0.0256315	0.189125	6.05259	0.195255
112	rs55669358	8	34312412	T	C	0.9095	0.0167	1.37e-08	0.921245	0.0383497	0.0162191	4.58917	0.332105
113	rs312477	3	53515136	G	A	1.0674	0.0115	1.38e-08	1.00538	0.0264816	0.419702	8.46449	0.075971
116	rs12447542	16	7744180	G	A	0.9182	0.0151	1.44e-08	1.00637	0.0357778	0.429561	7.95879	0.0930994
117	rs66885728	17	19014831	G	C	1.0913	0.0154	1.47e-08	1.00052	0.0372523	0.494484	4.83176	0.305
120	rs77853293	5	49840113	C	T	1.0561	0.0097	1.77e-08	0.993938	0.022722	0.394497	7.09205	0.131103
121	rs760608	6	114719447	G	A	1.0626	0.0108	1.9e-08	0.993657	0.0248653	0.399018	7.90777	0.0950157
122	rs6800435	3	10804551	C	A	0.921	0.0147	2e-08	0.987938	0.0362036	0.368736	4.0896	0.394016
123	rs58950470	11	65383755	G	T	0.9442	0.0102	2.07e-08	0.952124	0.0247986	0.0239451	1.81632	0.611389
125	rs281299	15	47686081	C	T	0.9463	0.0099	2.19e-08	0.948623	0.0237551	0.0131992	3.35913	0.499619
127	rs6701877	1	174015259	G	T	1.076	0.0131	2.37e-08	1.02253	0.0311371	0.237128	4.3351	0.362551
129	rs9881798	3	16846967	A	C	0.9475	0.0097	2.81e-08	0.931752	0.022595	0.000878461	2.0045	0.734932
131	rs6680011	1	95840866	A	C	0.9291	0.0132	2.83e-08	1.00982	0.031349	0.377683	7.79401	0.099422
132	rs35736453	6	128329493	T	TC	0.9412	0.0109	2.95e-08	0.9621	0.025143	0.0621869	3.96092	0.41132
133	rs2077586	2	73161551	A	G	1.0634	0.0111	2.96e-08	1.0713	0.0242241	0.00223416	1.32174	0.857676
134	rs893949	11	134296384	C	T	1.0548	0.0096	2.98e-08	1.03712	0.0223437	0.0514328	3.29706	0.509399
135	rs6678676	1	200266503	T	C	0.9367	0.0118	3.22e-08	0.951442	0.0280679	0.0380798	4.50858	0.341531
136	rs12129719	1	66324512	G	A	0.9472	0.0098	3.35e-08	0.931001	0.0226135	0.00078452	0.928974	0.920368
137	rs11993663	8	10032894	C	A	0.9463	0.01	3.4e-08	0.966868	0.0234871	0.0757088	1.13368	0.888893
140	rs13121251	4	143829759	T	C	1.0591	0.0105	4.06e-08	0.990119	0.0242278	0.340946	9.08005	0.0591294
141	rs2161711	16	71359066	A	G	1.0724	0.0128	4.22e-08	0.993161	0.0304434	0.410828	8.95461	0.062244
142	rs254782	5	88000630	A	G	0.8818	0.023	4.4e-08	1.02089	0.0481394	0.333766	12.4295	0.0144277
143	rs150437760	14	59981768	A	C	1.129	0.0222	4.58e-08	1.10813	0.0471463	0.0147122	3.33014	0.504171
144	rs7225476	17	78561603	G	A	0.9493	0.0095	4.86e-08	0.985734	0.0223449	0.260098	4.98119	0.289233
145	rs198160	16	24240725	G	T	1.0576	0.0103	4.88e-08	1.03899	0.022807	0.0467737	3.92495	0.416258

## Sheet: Supp Table 7
Supplementary Data Table 7: Partitioned heritability analysis of broad genomic categories.
* Assuming that genic SNPs explain 64.46% of total heritability.
NOTE: h2 Enrichment <1 equates to depletion (less h2 explained than expected by SNP content).
Significant CNS-related: genes in CNS gene sets that show conditionally indepdenent association in MAGMA analysis.
Annotation	Proportion of SNPs	Proportion h2	Proportion h2 (s.e.)	Proportion genic h2*	Enrichment h2	Enrichment h2 (s.e.)	Enrichment 2-sided p-value
Non Genic	0.47781	0.328884	0.0162086	NA	0.688316	0.0334838	1.52e-16
Genic (all)	0.52219	0.64457	0.0146318	1	1.23436	0.02802	5.92541e-14
Genic (all LoF intolerant)	0.149516	0.300832	0.0132392	0.466718	2.01203	0.0885465	2.78298e-24
Genic (all non-LoF intolerant)	0.372674	0.335637	0.0136529	0.520714	0.900617	0.0361333	0.00585971
Genic (all CNS-related)	0.183747	0.299188	0.014518	0.464168	1.62826	0.0790108	8.57322e-13
Genic (Significant CNS-related)	0.134128	0.265366	0.0134355	0.411695	1.97845	0.100169	3.1288e-17
Genic (Significant CNS-related + LoF intolerant)	0.218148	0.390395	0.0139163	0.605667	1.78959	0.0637929	5.0707e-26

## Sheet: Supp Table 8
Supplementary Data Table 8: Partitioned heritability analysis of background selection in schizophrenia and other phenotypes
The baseline model in this case uses the 53 Finucane et al. (2015) annotations + 2 Hussin et al. (2015) LD-based annotations + 3 own annotations (see Methods) for a total of 58 categories.
Baseline Z-Scores were calculated using all SNPs, and are correlated to power to detect enrichment.
The tau-C statistic was computed using both the top 2% BGS binary annotation and the full range of BGS values as a quantitative annotation.
For compatibility, in all traits we have used only HapMap SNPs and removed the xMHC and APOE regions
Reference numbers for each metric indicate references in the main text.
Trait	Ref.	Sample size	Baseline Z-scores	BGS tau-C p-value (binary)	BGS tau-C p-value (quantitative)
Schizophrenia	This study	105318	22.5947	0.0408691	0.0234191
Alzheimer's disease	121	54162	5.27675	0.723303	0.715965
Neuroticism	122	91370	8.33601	0.22347	0.430188
Type-2 Diabetes	123	110219	9.56692	0.84871	0.242382

## Sheet: Supp Table 9
Supplementary Data Table 9: MAGMA analysis results of the CNS-related gene set collection.
NOTE: Gene sets in red survive multiple-testing correction and the stepwise conditional analysis. Gene sets in purple survive the multiple-testing correction only.
FWER corrected p-value for all 134 sets
Gene set name	Number of genes	Beta	Semi-standardized beta	Standard error	Raw P-value	FWER-corrected P-value	Raw P-value after conditional analysis	Gene set rank in conditional analysis
FMRP_targets	798	0.229	0.0476	0.0416	1.9186e-08	1e-05	1.9186e-08	1
abnormal_behavior	1939	0.131	0.041	0.0278	1.198e-06	0.00018	1.3615e-05	2
abnormal_nervous_system_electrophysiology	201	0.315	0.0335	0.0773	2.2671e-05	0.00303	0.0019932	4
abnormal_learning|memory|conditioning	416	0.225	0.0342	0.057	3.8312e-05	0.00564	0.2054	not included
abnormal_CNS_synaptic_transmission	363	0.238	0.0339	0.0617	5.6137e-05	0.00807	0.37606	not included
Voltage-gated_Ca_channel_complexes	196	0.31	0.0325	0.0821	8.0077e-05	0.01144	0.016035	5
abnormal_synaptic_transmission	429	0.203	0.0313	0.057	0.00018352	0.02427	0.57614	not included
5HT_2C	16	0.998	0.0301	0.284	0.00022621	0.02924	0.0010675	3
abnormal_long_term_potentiation	142	0.346	0.0309	0.0987	0.0002315	0.02982	0.031103	6
abnormal_motor_capabilities|coordination|movement	1325	0.114	0.0302	0.0329	0.0002495	0.03197	0.69738	not included
abnormal_behavioral_response_to_xenobiotic	205	0.274	0.0294	0.0789	0.00025488	0.03262	0.12989	not included
abnormal_associative_learning	190	0.286	0.0296	0.0832	0.00028919	0.03677	0.11923	not included
seizures	242	0.239	0.0278	0.074	0.00062541	0.0729
abnormal_cued_conditioning_behavior	67	0.431	0.0265	0.143	0.0012793	0.13736
abnormal_consumption_behavior	437	0.16	0.0249	0.0552	0.0018385	0.18616
abnormal_spatial_learning	154	0.258	0.024	0.0911	0.002335	0.22543
abnormal_social|conspecific_interaction	240	0.208	0.0242	0.0742	0.0024988	0.23868
PSD_(human_core)	647	0.127	0.0238	0.0455	0.0026896	0.25259
abnormal_grooming_behavior	69	0.384	0.024	0.142	0.0035279	0.3087
abnormal_temporal_lobe_morphology	206	0.201	0.0216	0.0764	0.0042645	0.35516
abnormal_cerebrum_morphology	348	0.156	0.0217	0.0598	0.0044871	0.36787
abnormal_axon_extension	46	0.442	0.0226	0.173	0.0052265	0.40855
abnormal_hippocampus_morphology	200	0.197	0.0209	0.0775	0.0054395	0.41934
abnormal_telencephalon_morphology	484	0.133	0.0217	0.0521	0.0054658	0.42068
Pre-synaptic_active_zone	173	0.226	0.0223	0.0902	0.0060706	0.45184
abnormal_avoidance_learning_behavior	54	0.396	0.0219	0.159	0.0064625	0.47101
abnormal_neurotransmitter_level	55	0.375	0.0209	0.151	0.0066139	0.47761
Presynapse	470	0.135	0.0217	0.0557	0.0077878	0.5274
abnormal_miniature_excitatory_postsynaptic_currents	61	0.365	0.0214	0.153	0.0086476	0.56029
abnormal_neuron_morphology	933	0.091	0.0204	0.0388	0.0095127	0.59013
Synaptic_vesicle:_Glu-enriched	21	0.587	0.0203	0.262	0.012402	0.67503
abnormal_emotion|affect_behavior	364	0.137	0.0196	0.0617	0.012915	0.68746
abnormal_fear|anxiety-related_behavior	213	0.179	0.0196	0.0814	0.013812	0.70782
abnormal_hindbrain_morphology	304	0.143	0.0186	0.0658	0.014794	0.72895
abnormal_action_potential	77	0.268	0.0177	0.127	0.017395	0.77786
abnormal_excitatory_postsynaptic_currents	67	0.289	0.0178	0.141	0.020574	0.82498
NMDAR_network	58	0.309	0.0177	0.152	0.020814	0.82782
abnormal_prepulse_inhibition	70	0.278	0.0175	0.137	0.021219	0.83247
abnormal_aggression-related_behavior	63	0.29	0.0173	0.143	0.021236	0.83266
abnormal_contextual_conditioning_behavior	89	0.23	0.0163	0.117	0.025158	0.87271
abnormal_nervous_system_morphology	1721	0.0556	0.0165	0.0291	0.028109	0.89634
abnormal_temporal_memory	108	0.201	0.0157	0.107	0.030077	0.90946
abnormal_forebrain_morphology	619	0.0841	0.0155	0.0463	0.034706	0.93322
abnormal_limbic_system_morphology	236	0.128	0.0147	0.0713	0.036422	0.94071
abnormal_sensory_capabilities|reflexes|nociception	574	0.087	0.0154	0.0485	0.036606	0.94153
abnormal_brain_morphology	1041	0.064	0.0151	0.0363	0.038951	0.95026
abnormal_neuron_differentiation	201	0.143	0.0152	0.0816	0.039554	0.95216
abnormal_innervation	130	0.18	0.0154	0.104	0.041125	0.95663
abnormal_basal_ganglion_morphology	61	0.244	0.0144	0.141	0.041773	0.95846
abnormal_neuron_physiology	386	0.0998	0.0146	0.0585	0.043962	0.96366
abnormal_inhibitory_postsynaptic_currents	52	0.264	0.0143	0.156	0.045434	0.96674
abnormal_cerebral_cortex_morphology	184	0.136	0.0138	0.081	0.04665	0.96893
abnormal_glutamate-mediated_receptor_currents	39	0.316	0.0149	0.19	0.047956	0.97136
abnormal_neuron_apoptosis	151	0.156	0.0144	0.0944	0.04923	0.97366
abnormal_brain_ventricle_morphology	150	0.15	0.0138	0.095	0.056842	0.98326
abnormal_dendrite_morphology	84	0.19	0.0131	0.121	0.058172	0.98454
abnormal_synaptic_depression	73	0.207	0.0133	0.133	0.059619	0.98581
abnormal_response_to_novelty	150	0.139	0.0128	0.0948	0.07139	0.99286
fatigue	31	0.291	0.0122	0.199	0.072311	0.99321
abnormal_social_investigation	55	0.229	0.0128	0.158	0.07289	0.99345
abnormal_motor_learning	29	0.291	0.0118	0.206	0.079303	0.99534
abnormal_nervous_system_development	782	0.0587	0.0121	0.0421	0.081461	0.99598
Synaptic_vesicle	356	0.0877	0.0123	0.0633	0.082899	0.99638
abnormal_parental_behavior	116	0.146	0.0118	0.105	0.0836	0.99651
Chrna7	54	0.218	0.0121	0.159	0.084964	0.99687
abnormal_excitatory_postsynaptic_potential	58	0.2	0.0114	0.146	0.085797	0.99697
abnormal_corpus_callosum_morphology	76	0.166	0.0109	0.131	0.10191	0.99865
abnormal_brain_ventricle|choroid_plexus_morphology	202	0.0997	0.0106	0.0799	0.10616	0.99888
GABA_PSC	15	0.416	0.0121	0.339	0.1103	0.99912
abnormal_somatic_nervous_system_morphology	583	0.059	0.0106	0.0487	0.1127	0.99922
abnormal_conditioned_place_preference_behavior	27	0.271	0.0106	0.224	0.11329	0.99924
abnormal_depression-related_behavior	74	0.147	0.00952	0.133	0.13398	0.99974
abnormal_hindbrain_development	112	0.123	0.00981	0.112	0.13533	0.99977
abnormal_response_to_new_environment	121	0.114	0.00941	0.105	0.13967	0.99984
abnormal_sexual_interaction	66	0.149	0.00911	0.14	0.14276	0.99985
abnormal_neural_plate_morphology	22	0.26	0.00918	0.247	0.14675	0.9999
abnormal_oligodendrocyte_morphology	29	0.249	0.0101	0.24	0.14927	0.9999
abnormal_glial_cell_physiology	55	0.161	0.00897	0.156	0.15154	0.9999
abnormal_brain_size	178	0.0859	0.00859	0.0848	0.15571	0.99991
abnormal_paired-pulse_facilitation	37	0.193	0.00886	0.191	0.15597	0.99991
abnormal_neurite_morphology	207	0.0738	0.00795	0.0808	0.18039	0.99996
abnormal_circadian_rhythm	66	0.125	0.00762	0.14	0.18724	0.99996
abnormal_lateral_ventricle_morphology	92	0.106	0.00765	0.12	0.18802	0.99996
CYFIP1_all	35	0.149	0.00665	0.175	0.19597	0.99998
abnormal_stratification_in_cerebral_cortex	25	0.182	0.00684	0.231	0.2163	1
abnormal_spatial_reference_memory	35	0.152	0.00679	0.199	0.22126	1
abnormal_neuronal_migration	83	0.0896	0.00613	0.124	0.23583	1
abnormal_fourth_ventricle_morphology	19	0.189	0.00622	0.266	0.23843	1
abnormal_object_recognition_memory	41	0.126	0.00607	0.186	0.24946	1
abnormal_neocortex_morphology	21	0.181	0.00624	0.273	0.25384	1
abnormal_astrocyte_morphology	84	0.0794	0.00547	0.122	0.25737	1
abnormal_dopaminergic_neuron_morphology	25	0.149	0.00562	0.236	0.26306	1
abnormal_glial_cell_morphology	216	0.0471	0.00519	0.0802	0.27846	1
abnormal_CNS_glial_cell_morphology	159	0.0498	0.00471	0.0925	0.29497	1
abnormal_cerebellum_development	81	0.0716	0.00485	0.133	0.29571	1
abnormal_autonomic_nervous_system_morphology	49	0.087	0.00458	0.164	0.29803	1
abnormal_brainstem_morphology	157	0.0478	0.00449	0.0922	0.30206	1
abnormal_forebrain_development	128	0.0513	0.00436	0.101	0.3058	1
abnormal_telencephalon_development	85	0.0617	0.00428	0.122	0.30718	1
abnormal_postnatal_subventricular_zone_morphology	21	0.128	0.0044	0.272	0.31947	1
abnormal_axon_guidance	37	0.0995	0.00456	0.214	0.32132	1
abnormal_embryonic|fetal_subventricular_zone_morphology	30	0.0936	0.00386	0.211	0.32834	1
ARC	24	0.0997	0.00368	0.23	0.33267	1
abnormal_discrimination_learning	19	0.11	0.0036	0.258	0.33522	1
thin_cerebral_cortex	44	0.071	0.00354	0.171	0.33945	1
abnormal_brain_white_matter_morphology	122	0.0407	0.00337	0.104	0.3481	1
abnormal_sleep_behavior	42	0.0667	0.00326	0.175	0.35184	1
abnormal_nervous_system_tract_morphology	114	0.0359	0.00288	0.11	0.37224	1
abnormal_somatosensory_cortex_morphology	19	0.0695	0.00228	0.263	0.39562	1
abnormal_parietal_lobe_morphology	23	0.056	0.00202	0.227	0.40258	1
PSD-95_(core)	56	0.0345	0.00194	0.152	0.41023	1
abnormal_cerebral_cortex_pyramidal_cell_morphology	20	0.0417	0.00141	0.219	0.4246	1
abnormal_brain_development	476	0.00676	0.0011	0.0537	0.44995	1
abnormal_axon_morphology	119	0.0103	0.000846	0.106	0.46135	1
abnormal_synaptic_plasticity	35	0.0103	0.00046	0.186	0.47789	1
Synaptic_vesicle:_GABA-enriched	23	0.00898	0.000324	0.27	0.48672	1
abnormal_neuronal_precursor_cell_number	30	0.0019	7.82e-05	0.204	0.49629	1
abnormal_microglial_cell_morphology	50	-0.00287	-0.000153	0.163	0.50704	1
abnormal_synapse_morphology	96	-0.00908	-0.000668	0.121	0.52998	1
abnormal_third_ventricle_morphology	52	-0.0259	-0.00141	0.157	0.56575	1
abnormal_ependyma_morphology	20	-0.0647	-0.00218	0.257	0.59931	1
abnormal_spinal_cord_morphology	205	-0.0245	-0.00263	0.0801	0.62025	1
abnormal_spatial_working_memory	37	-0.0587	-0.00269	0.176	0.63078	1
abnormal_myelination	114	-0.0443	-0.00355	0.101	0.66888	1
abnormal_thalamus_morphology	30	-0.0896	-0.00369	0.203	0.67051	1
mGluR5	37	-0.0811	-0.00371	0.179	0.67474	1
abnormal_neuron_proliferation	63	-0.0662	-0.00395	0.137	0.68594	1
abnormal_brain_vasculature_morphology	32	-0.136	-0.00578	0.2	0.7511	1
abnormal_neural_tube_morphology|development	381	-0.0454	-0.0066	0.0601	0.7747	1
abnormal_midbrain_morphology	92	-0.0929	-0.00669	0.119	0.78229	1
abnormal_pituitary_gland_morphology	82	-0.102	-0.00695	0.123	0.79743	1
abnormal_nerve_conduction	42	-0.141	-0.0069	0.169	0.79862	1
abnormal_hypothalamus_morphology	31	-0.156	-0.00654	0.18	0.80734	1
abnormal_diencephalon_morphology	196	-0.0943	-0.00989	0.0805	0.87929	1

[truncated: 6 more sheets: Supp Table 10, Supp Table 11, Supp Table 12, Supp Table 13, Supp Table 14, Supp Table 15]
